# Supplementary material for: Efficient, one-step, cascade synthesis of densely functionalized furans from unprotected carbohydrates in basic aqueous media
Source: Royal Society of Chemistry journal article supplement (doi:10.1039/c8gc03509a), 2019-01-01

## **Efficient, one-step, cascade synthesis of densely functionalized furans from unprotected carbohydrates in basic aqueous media**

Mallikharjuna Rao Lambu and Zaher M. A. Judeh\*

*\*School of Chemical and Biomedical Engineering, Nanyang Technological University, 62 Nanyang Drive, N1.2-B1-14, Singapore 637459. Tel.: +65-67906738; Fax: +65-67947553. Email: Zaher@ntu.edu.sg*

### **Contents**

|                         |      |
|-------------------------|------|
| Copies of spectra ..... | 2-47 |
|-------------------------|------|

**$^1\text{H}$  NMR of the reaction between D-(+)- ribose and malononitrile in presence of  $\text{InCl}_3$  in  $\text{D}_2\text{O}$**

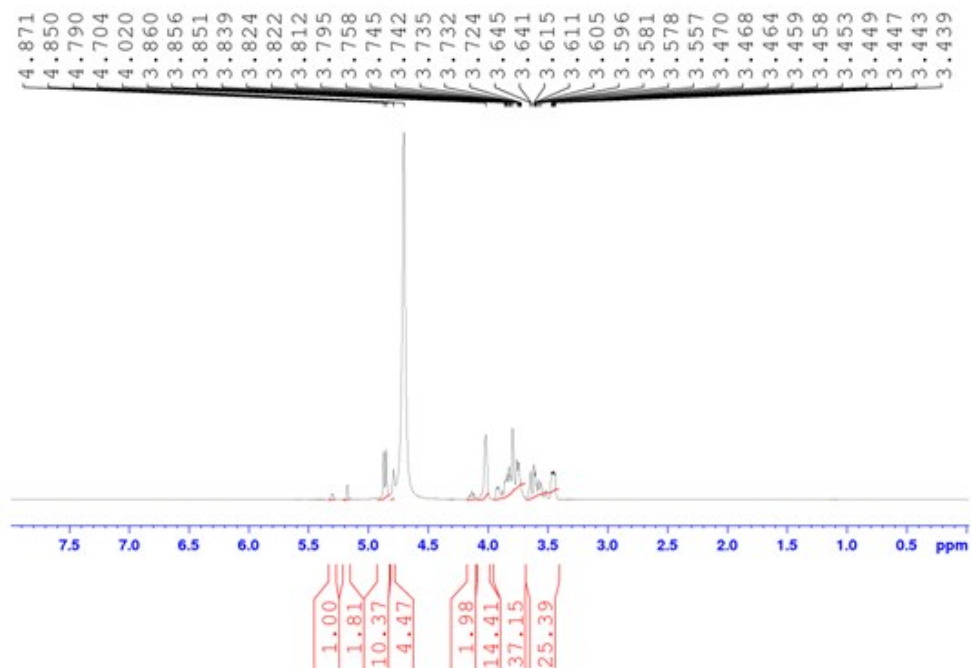

**$^1\text{H}$  NMR of the reaction between D-(+)- ribose and malononitrile in presence of  $\text{Yb}(\text{OTf})_3$  in  $\text{D}_2\text{O}$**

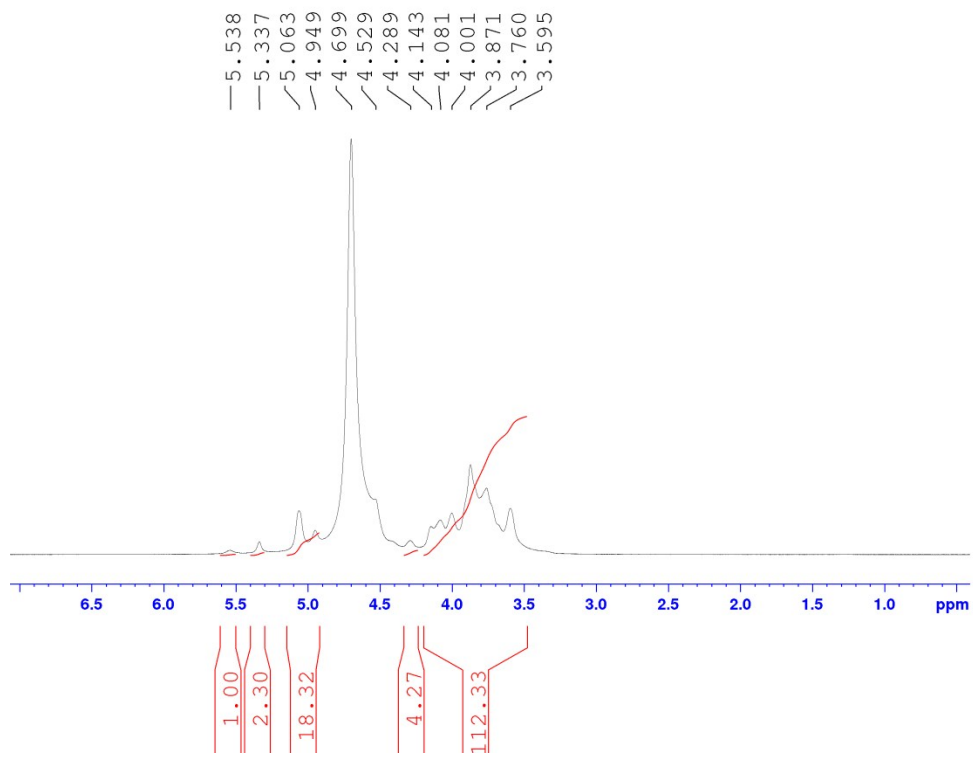

**<sup>1</sup>H NMR of the reaction between D-(+)- ribose and malononitrile in presence of CeCl<sub>3</sub> in D<sub>2</sub>O**

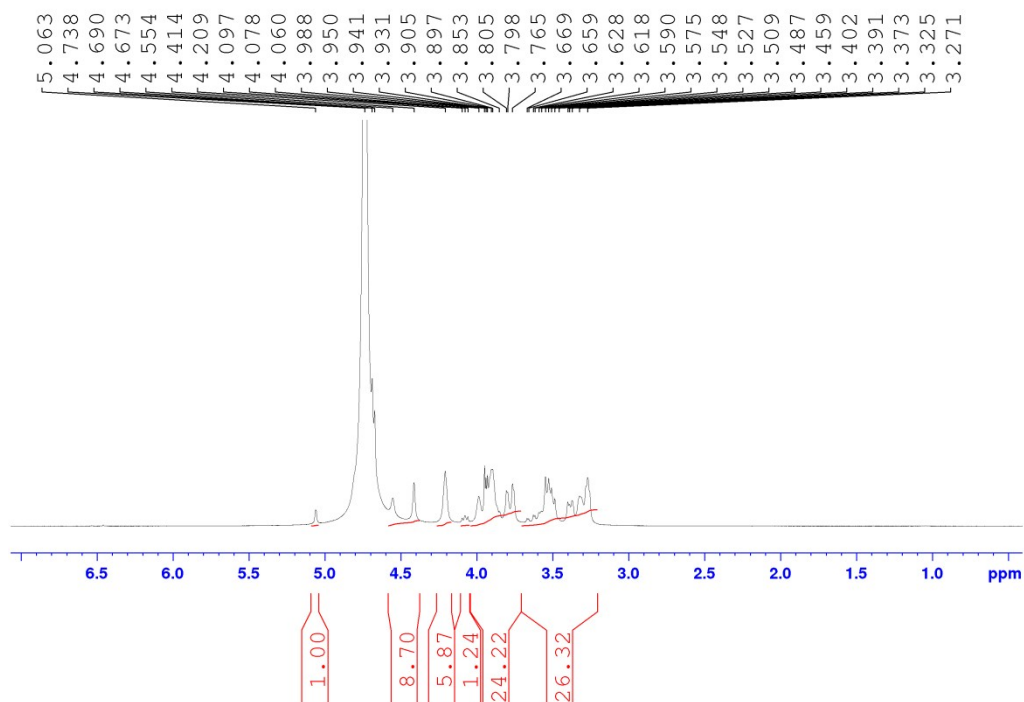

**<sup>1</sup>H NMR of the reaction between D-(+)- ribose and malononitrile in presence of DBU (1.0 equiv.) in D<sub>2</sub>O**

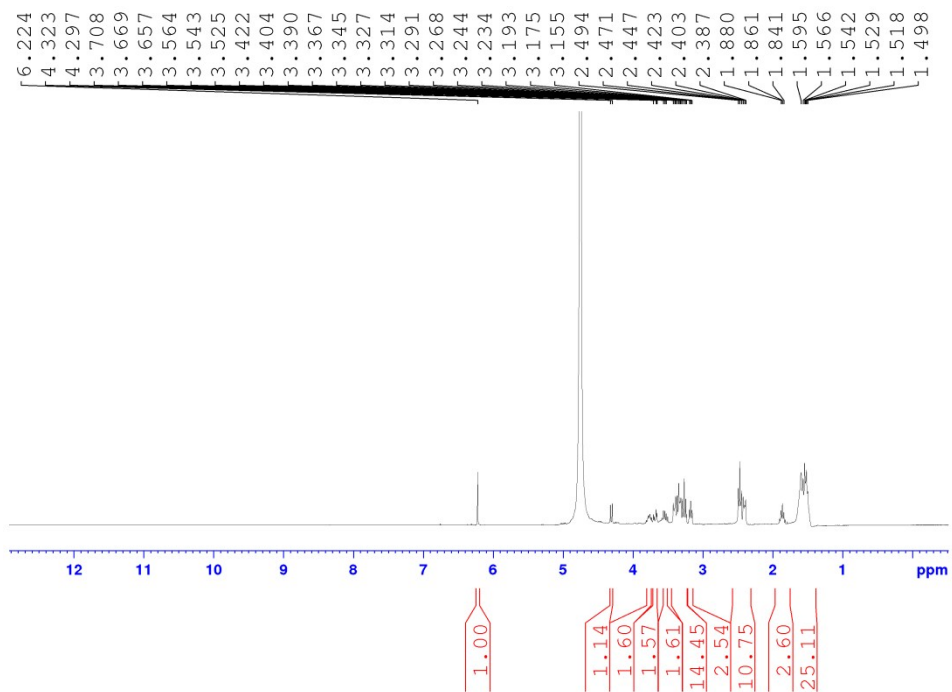

<sup>1</sup>H NMR of the reaction between D-(+)- ribose and malononitrile in presence of EtN<sub>3</sub> (1.0 equiv.) in D<sub>2</sub>O

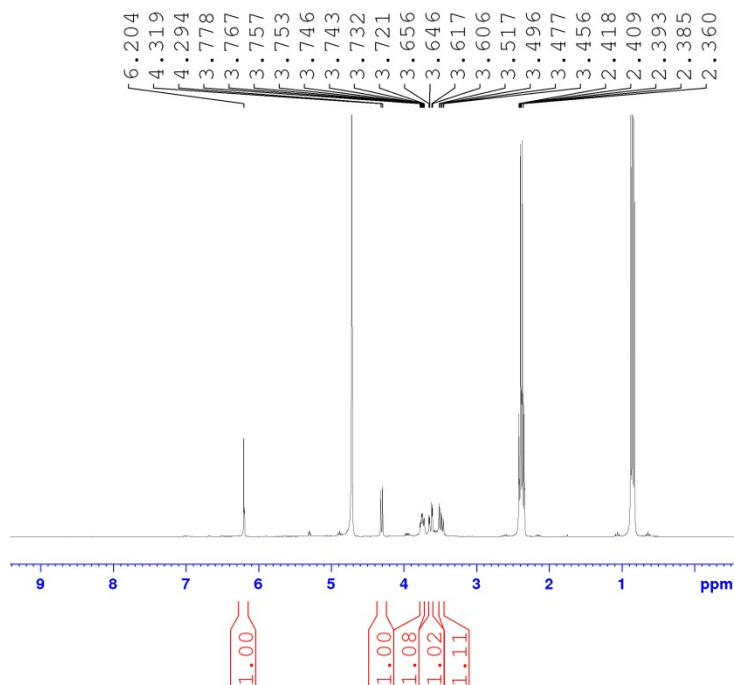

<sup>1</sup>H NMR of the reaction between D-(+)- ribose and malononitrile in presence of pyridine (1.0 equiv.) in D<sub>2</sub>O

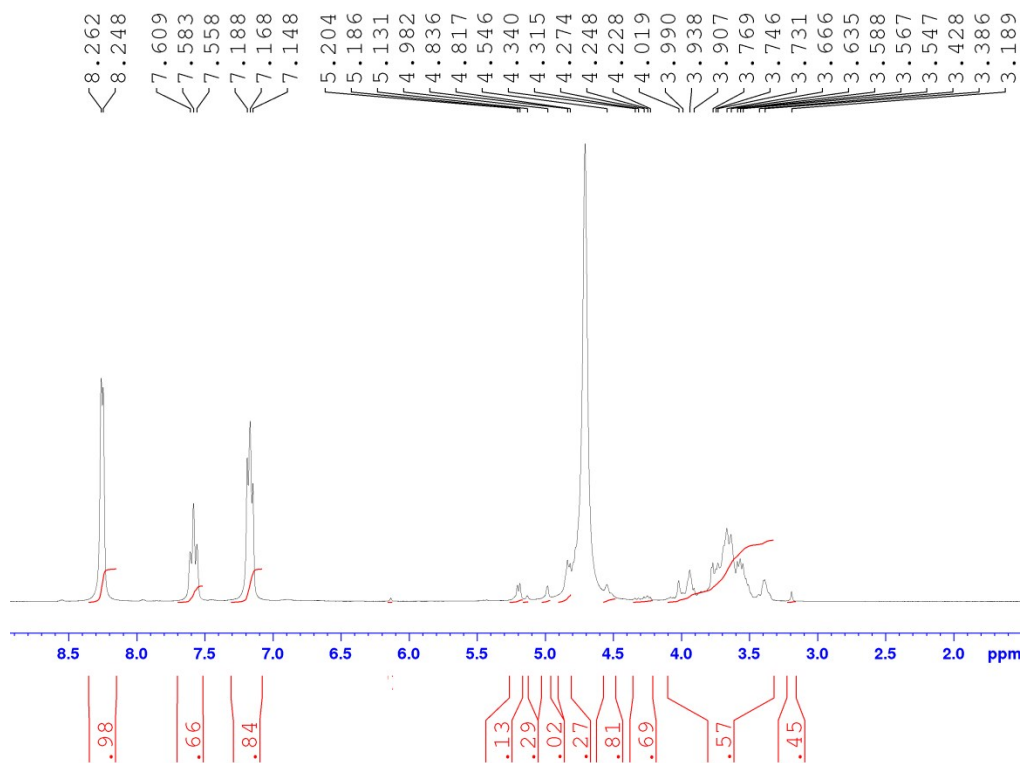

**$^1\text{H}$  NMR of the reaction between D-(+)- ribose and malononitrile in presence of NaOMe (1.0 equiv.) in  $\text{D}_2\text{O}$**

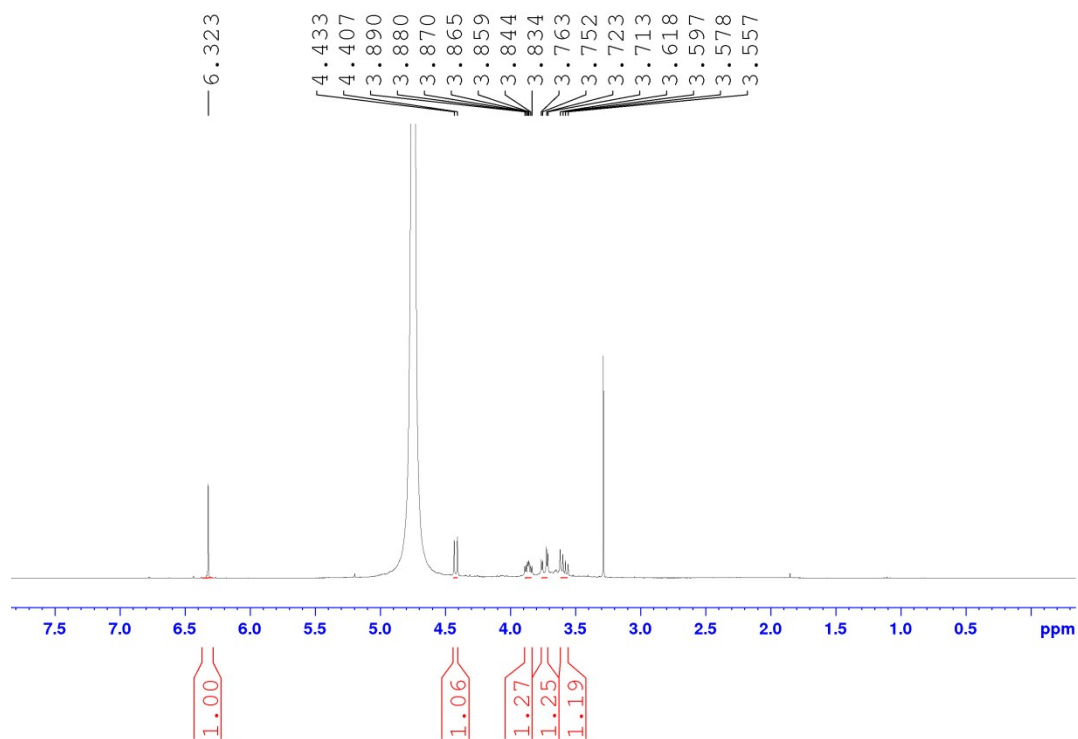

**$^1\text{H}$  NMR of the reaction between D-(+)- ribose and malononitrile in presence of  $\text{K}_2\text{CO}_3$  (1.0 equiv.) in  $\text{D}_2\text{O}$**

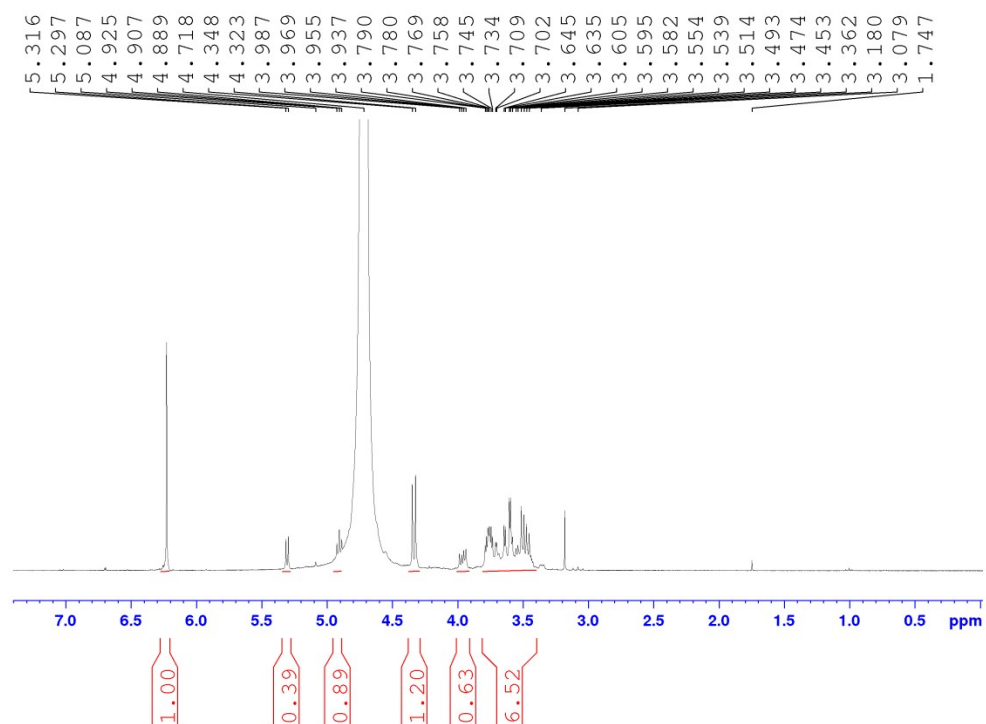

**$^1\text{H}$  NMR of the reaction between D-(+)- ribose and malononitrile in presence of  $\text{NaHCO}_3$  (1.0 equiv.) in  $\text{D}_2\text{O}$**

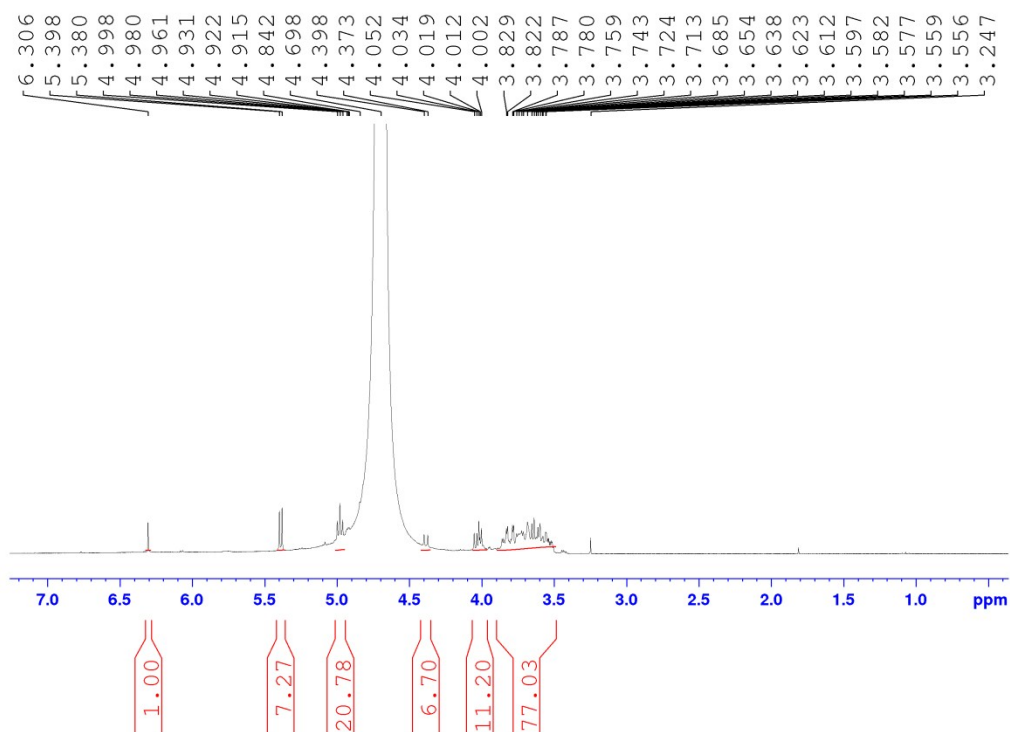

**$^1\text{H}$  NMR of the reaction between D-(+)- ribose and malononitrile in presence of 10 mol%  $\text{Et}_3\text{N}$  after 4 h in  $\text{D}_2\text{O}$**

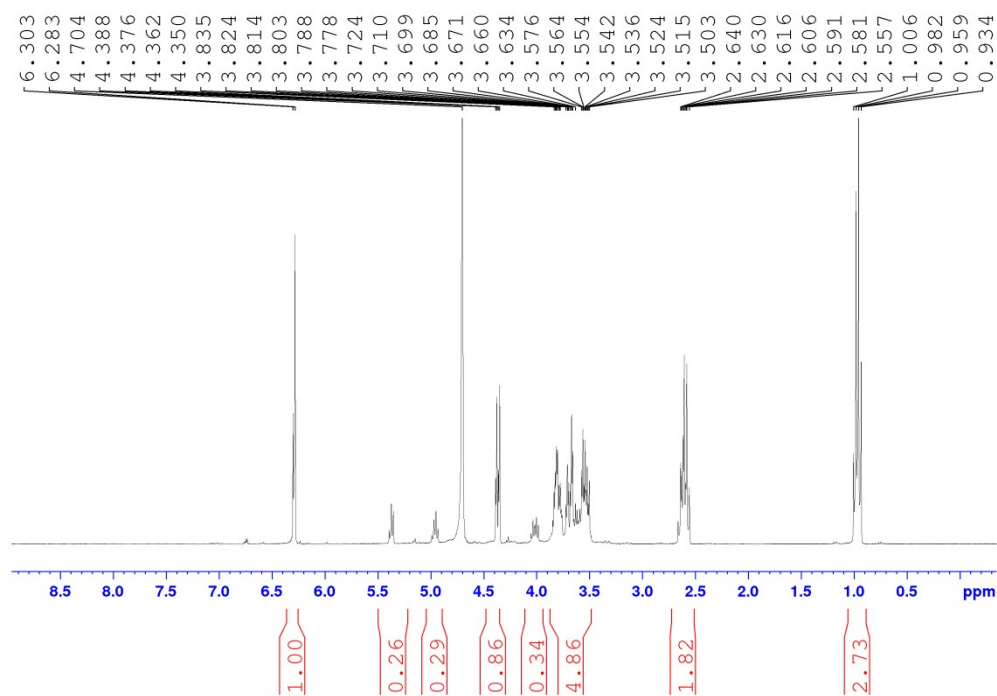

**$^1\text{H}$  NMR of the reaction between D-(+)- ribose and malononitrile in presence of 5 mol%  $\text{Et}_3\text{N}$  after 4 h in  $\text{D}_2\text{O}$**

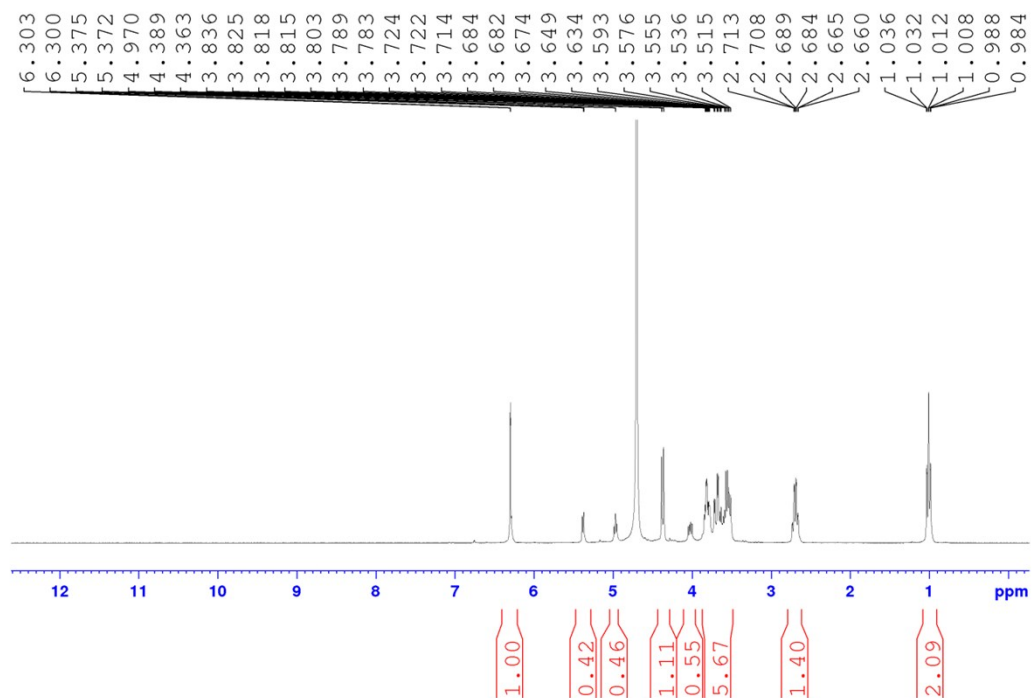

**$^1\text{H}$  NMR of the reaction between D-(+)- ribose and malononitrile in presence of 15 mol%  $\text{CsCO}_3$  after 4 h in  $\text{D}_2\text{O}$**

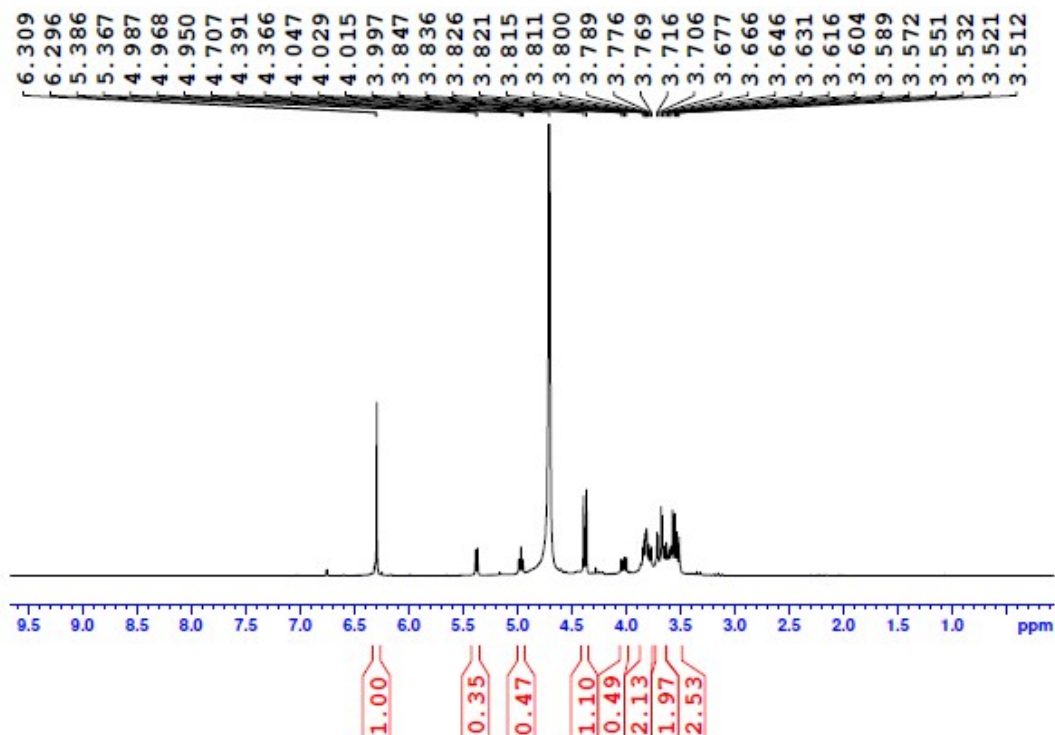

$^1\text{H}$  NMR of the reaction between D-(+)- ribose and malononitrile in presence of 15 mol%  $\text{K}_3\text{PO}_4$  after 4 h in  $\text{D}_2\text{O}$

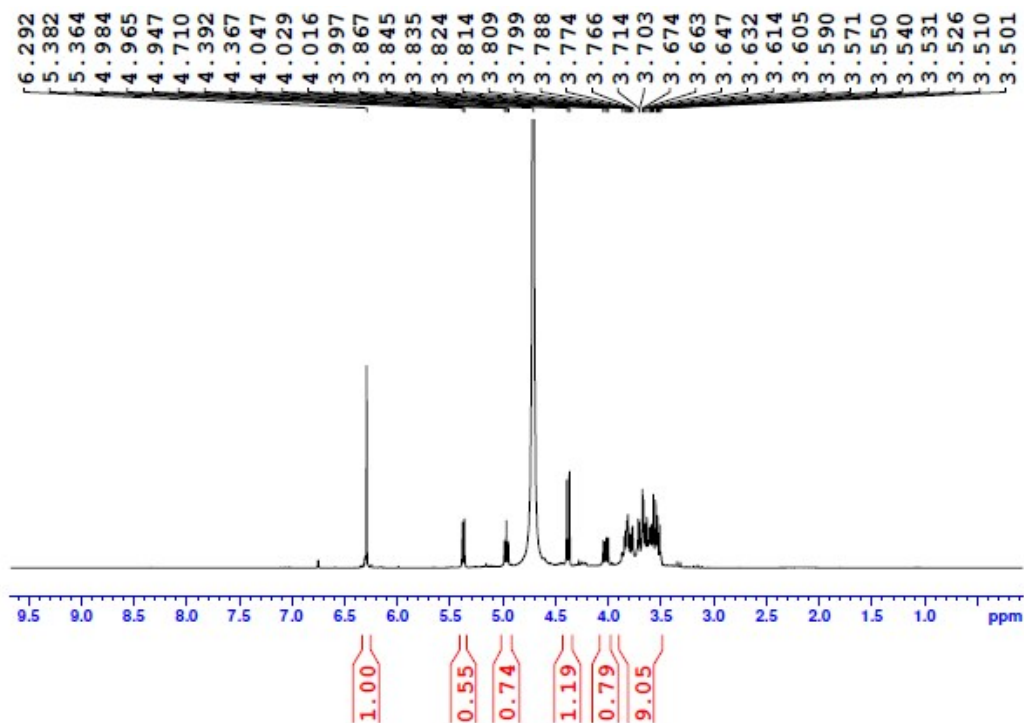

$^1\text{H}$  NMR of the reaction between D-(+)- ribose and malononitrile in presence of 15 mol%  $\text{NaO}^t\text{Bu}$  after 4 h in  $\text{D}_2\text{O}$

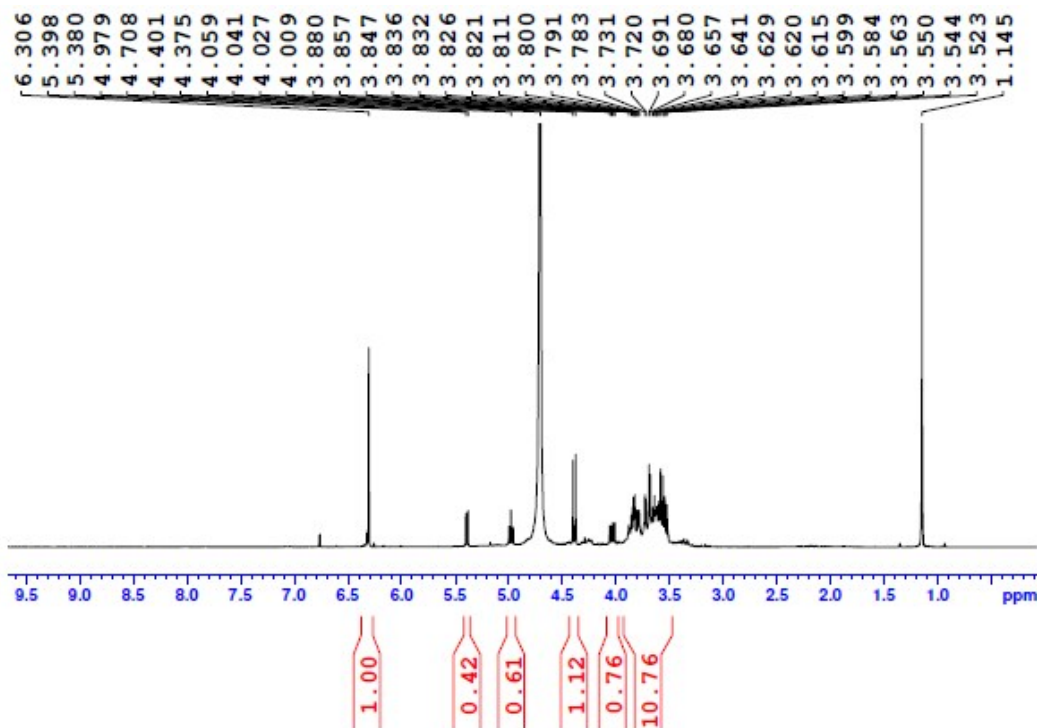



$^1\text{H}$  NMR of the reaction between D-(+)- ribose and malononitrile in presence of 15 mol%  $\text{Me}_3\text{N}$  after 4 h in  $\text{D}_2\text{O}$

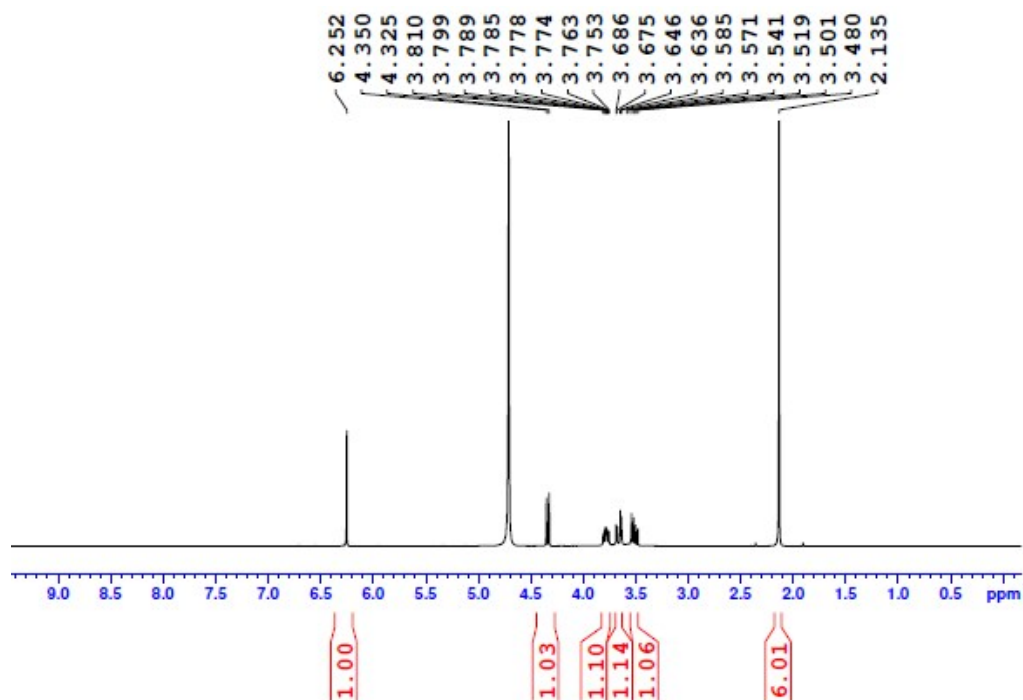

$^1\text{H}$  NMR of the reaction between D-(+)- ribose and malononitrile in presence of 15 mol%  $\text{Et}_3\text{N}$  after 4 h in MeOD

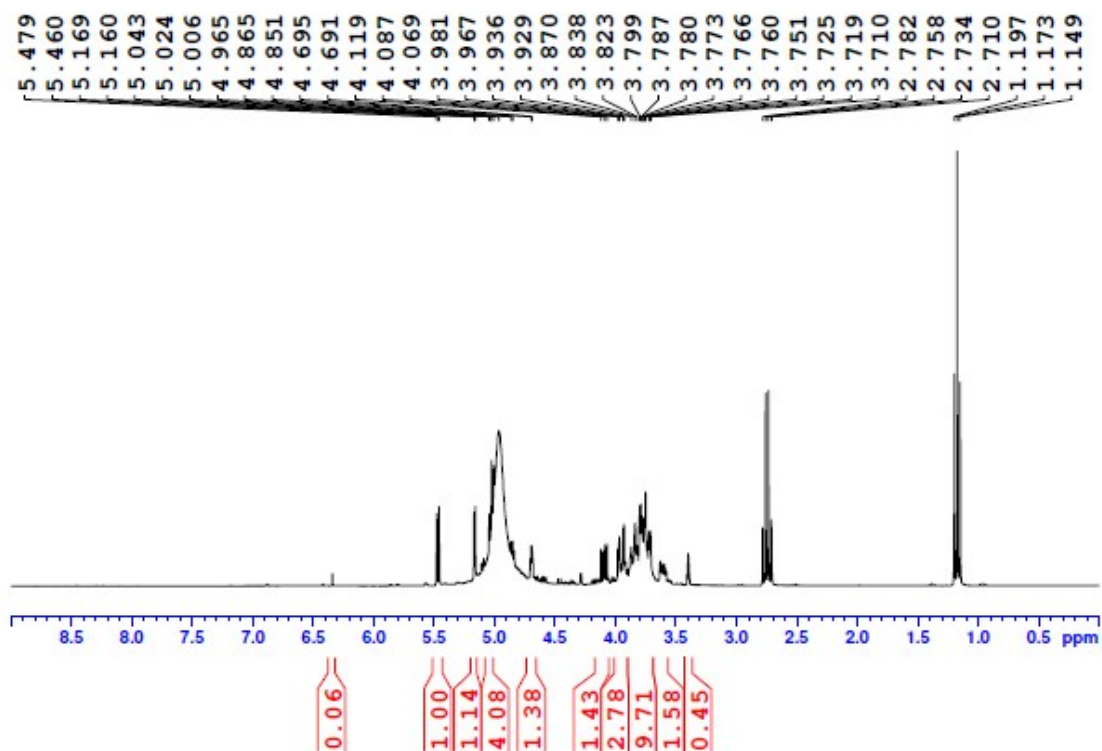

# <sup>1</sup>H NMR Spectra of compound 7a

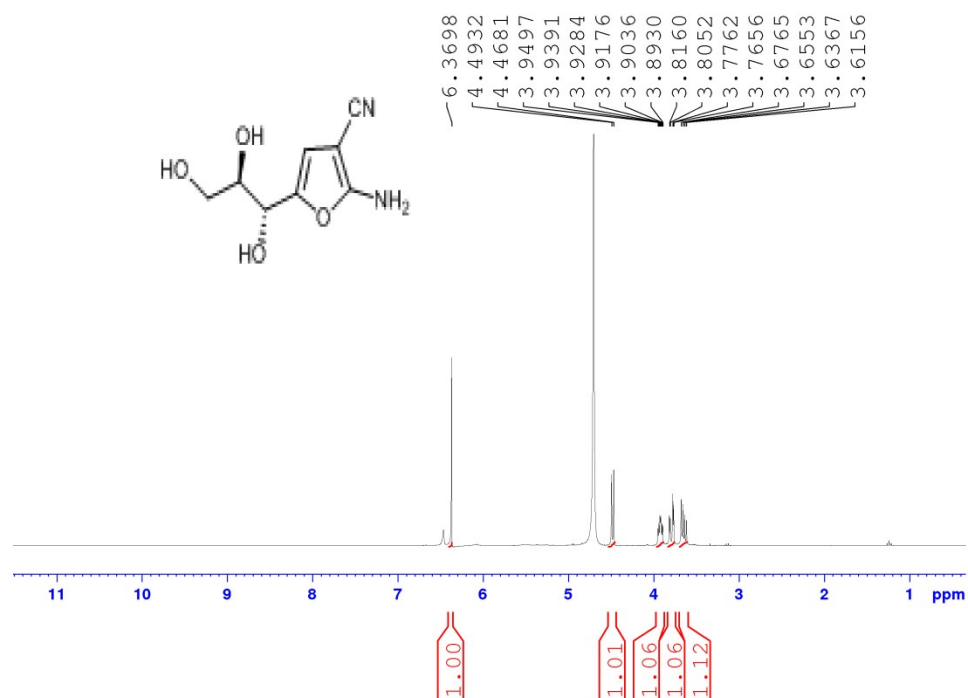

## <sup>13</sup>C NMR Spectra of compound 7a

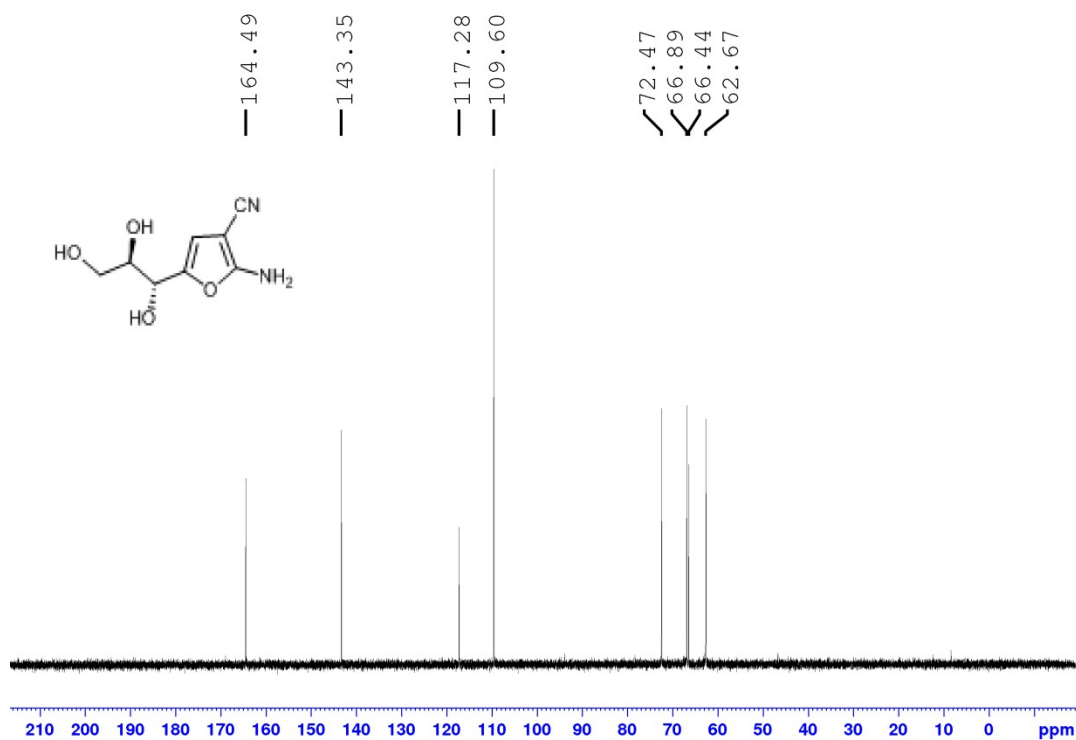

# <sup>1</sup>H NMR Spectra of compound 9a

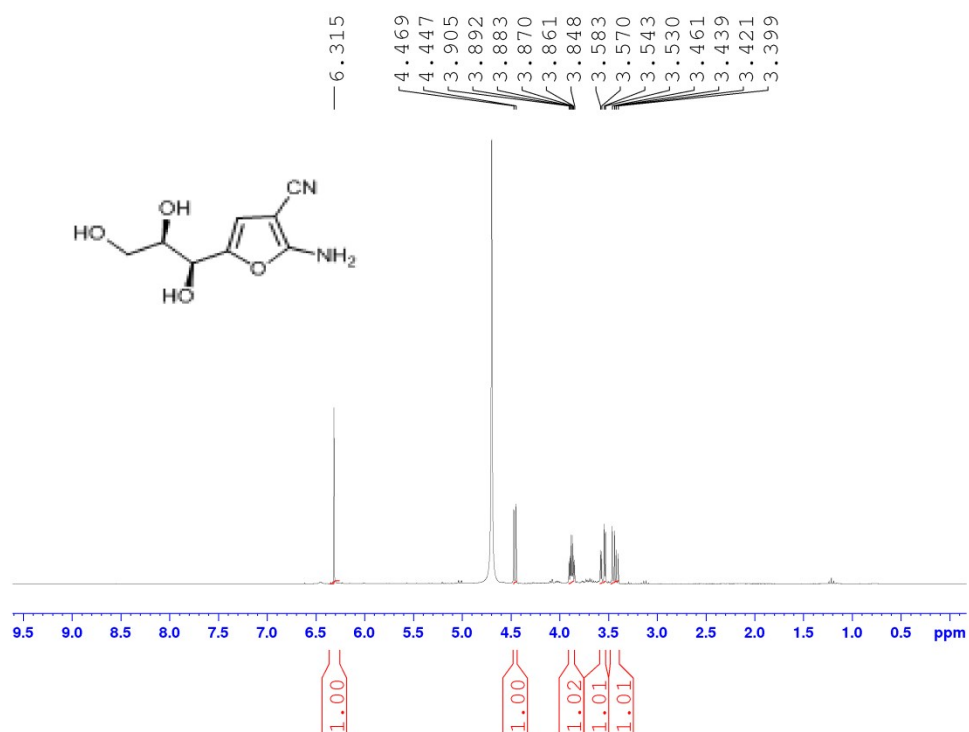

## <sup>13</sup>C NMR Spectra of compound 9a

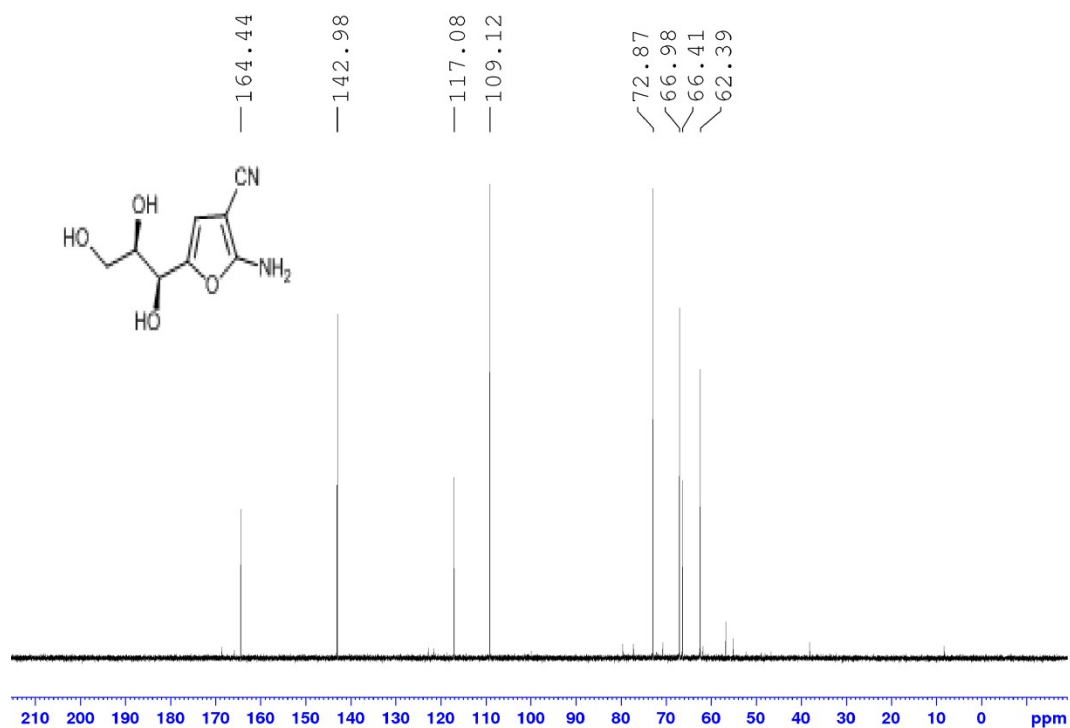

# <sup>1</sup>H NMR Spectra of compound 10a

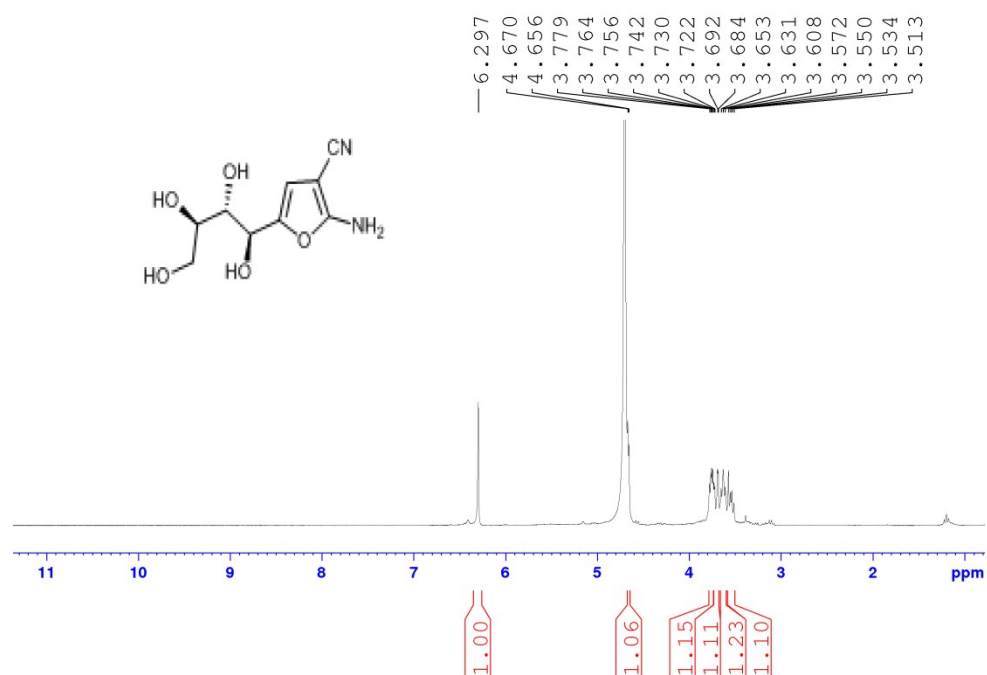

# <sup>13</sup>C NMR Spectra of compound 10a

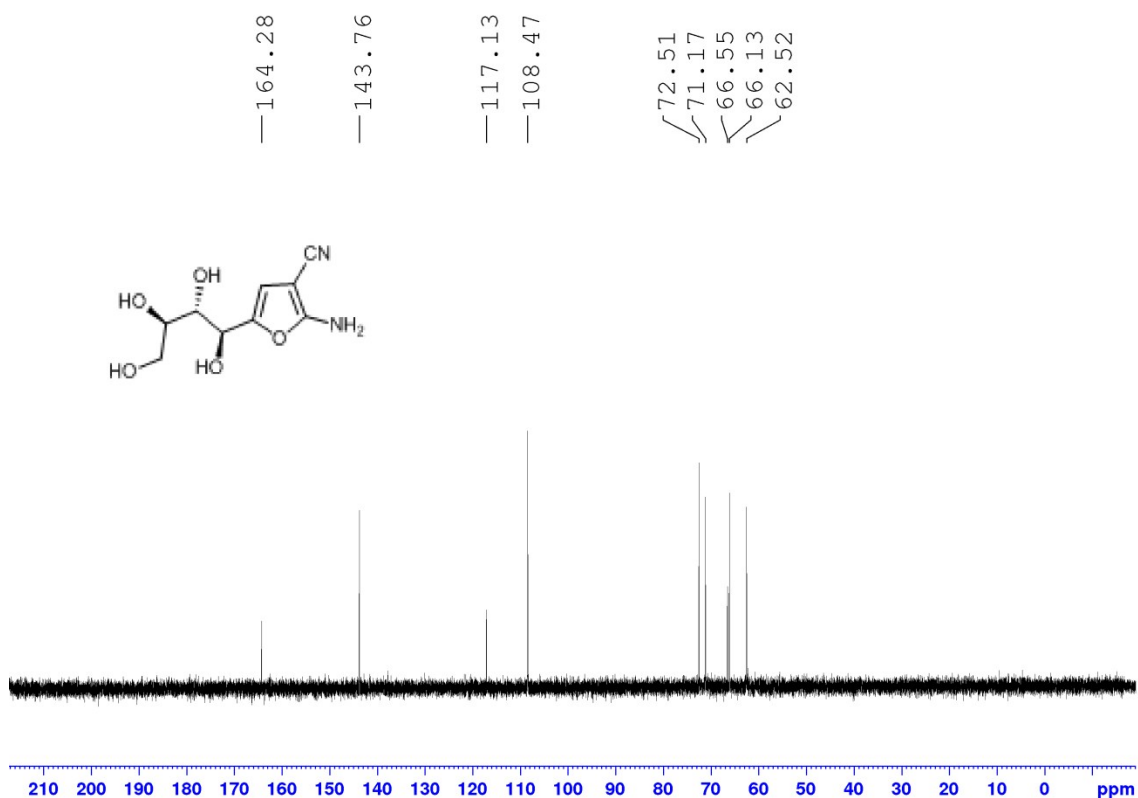

# **<sup>1</sup>H NMR Spectra of compound 12a**

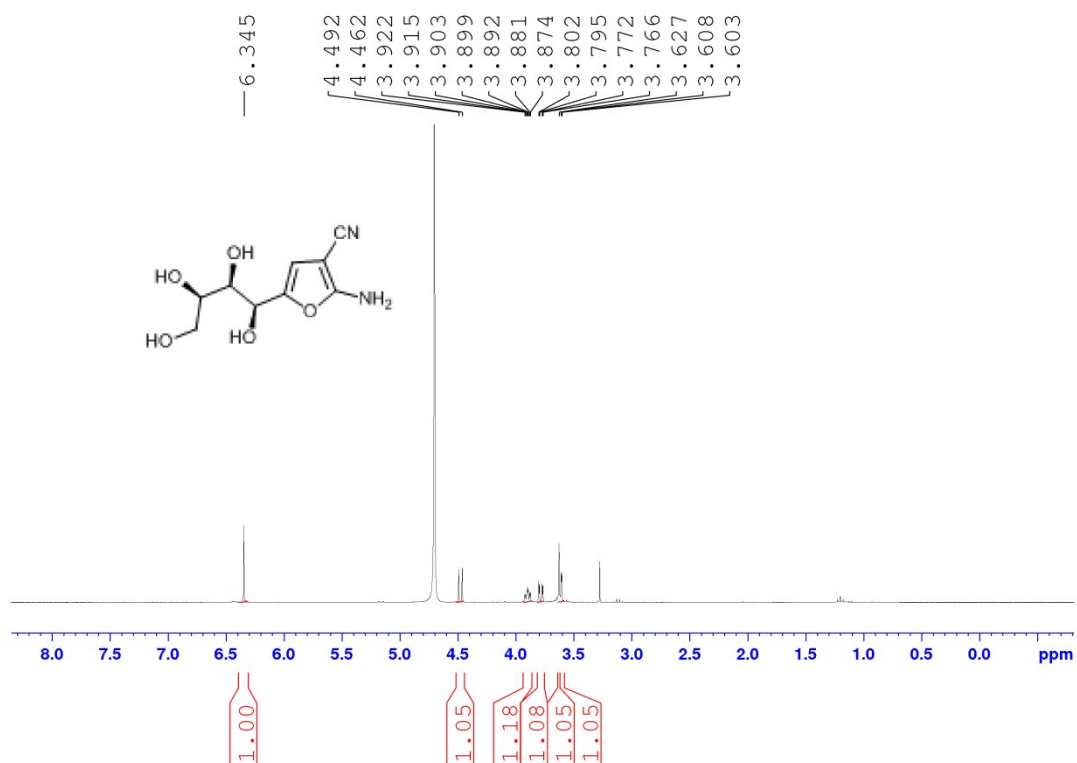

# **<sup>13</sup>C NMR Spectra of compound 12a**

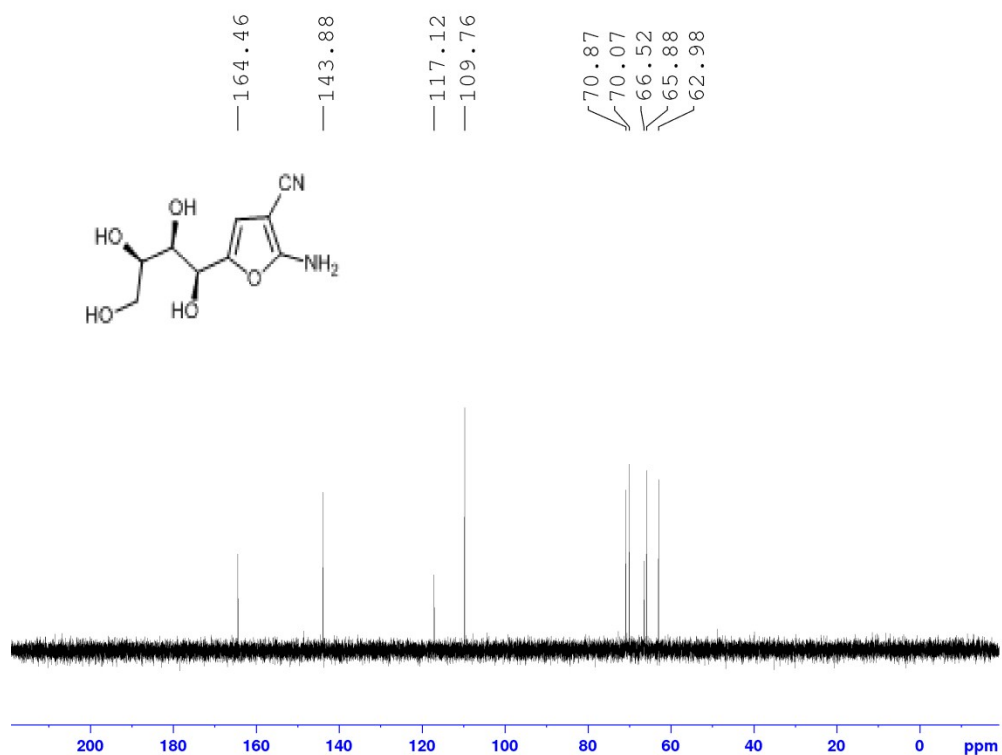

# <sup>1</sup>H NMR Spectra of compound 13a

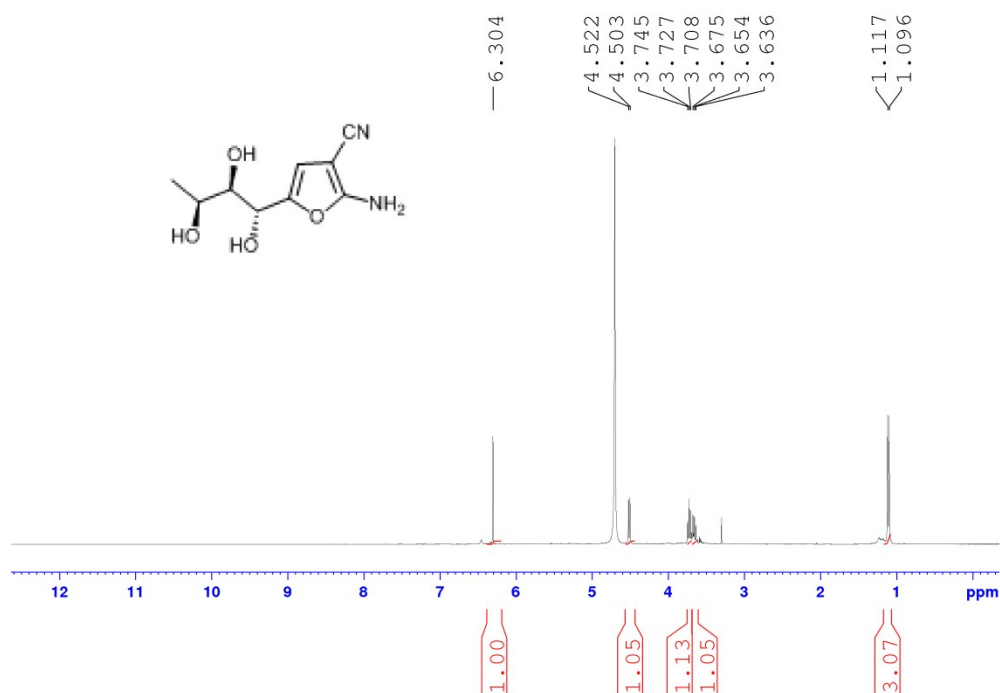

# <sup>13</sup>C NMR Spectra of compound 13a

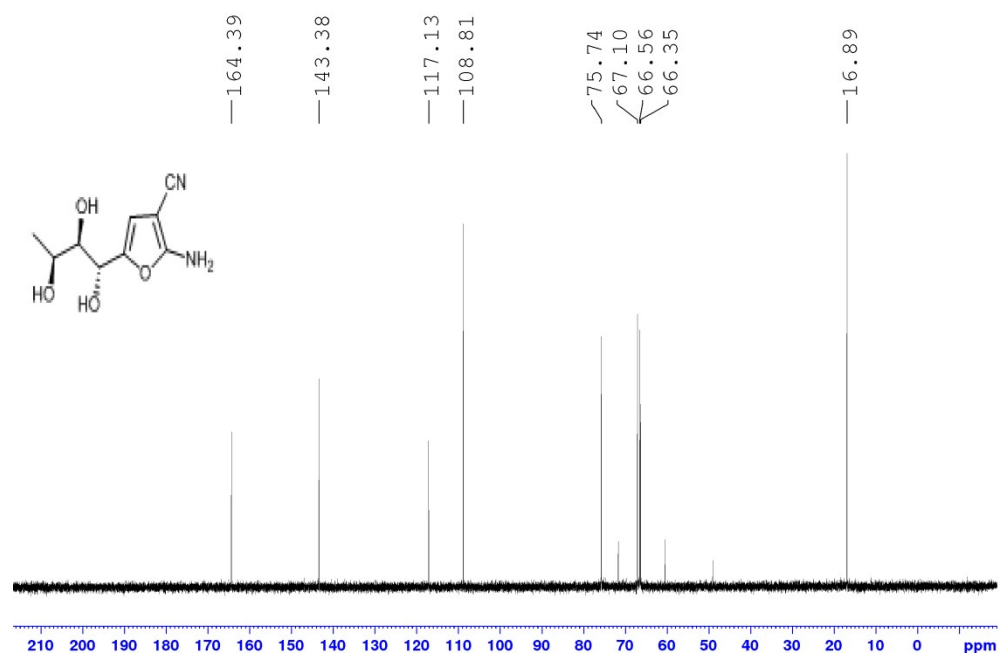

# <sup>1</sup>H NMR Spectra of compound 14a

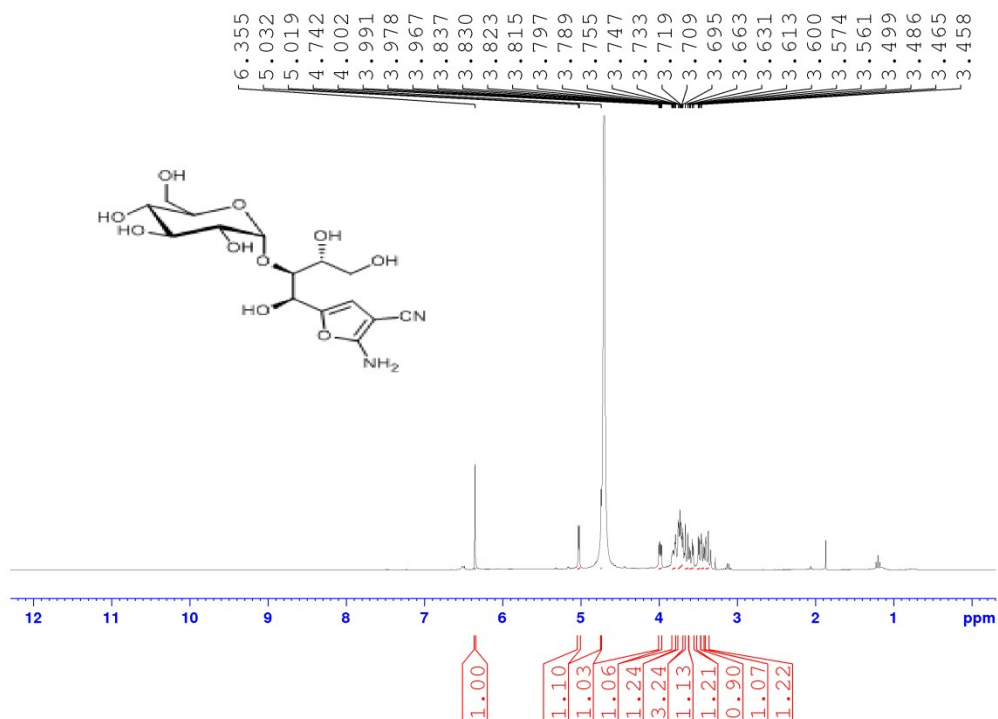

# <sup>13</sup>C NMR Spectra of compound 14a

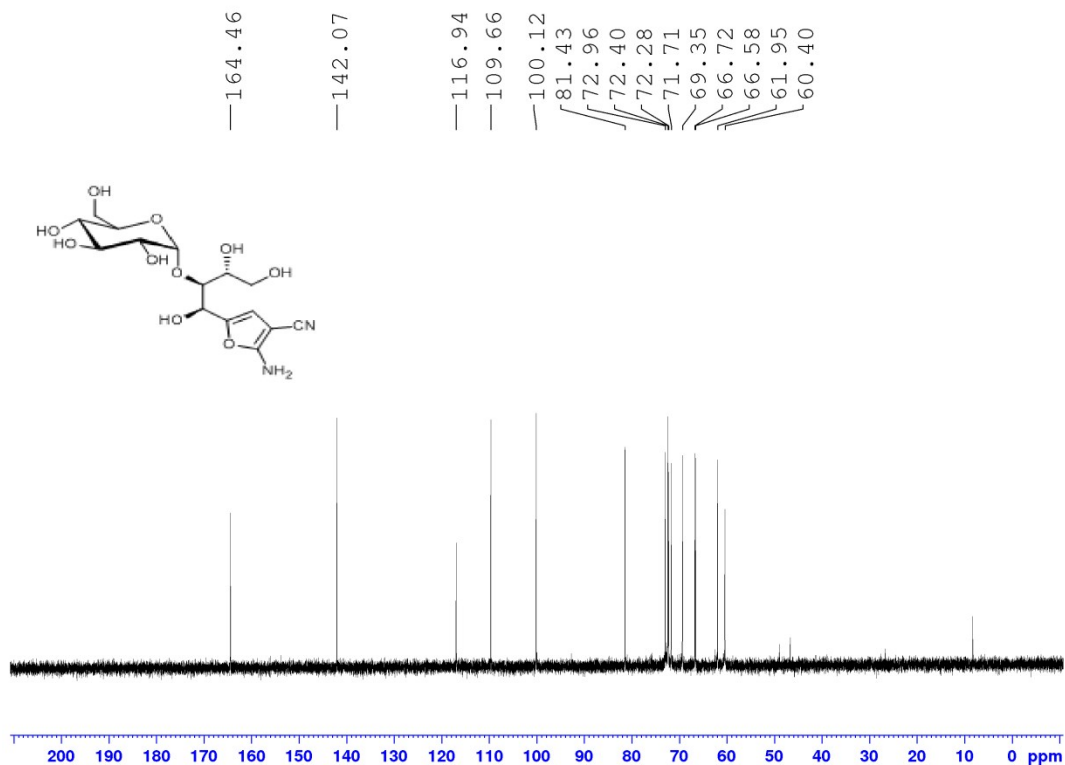

# <sup>1</sup>H NMR Spectra of compound 15a

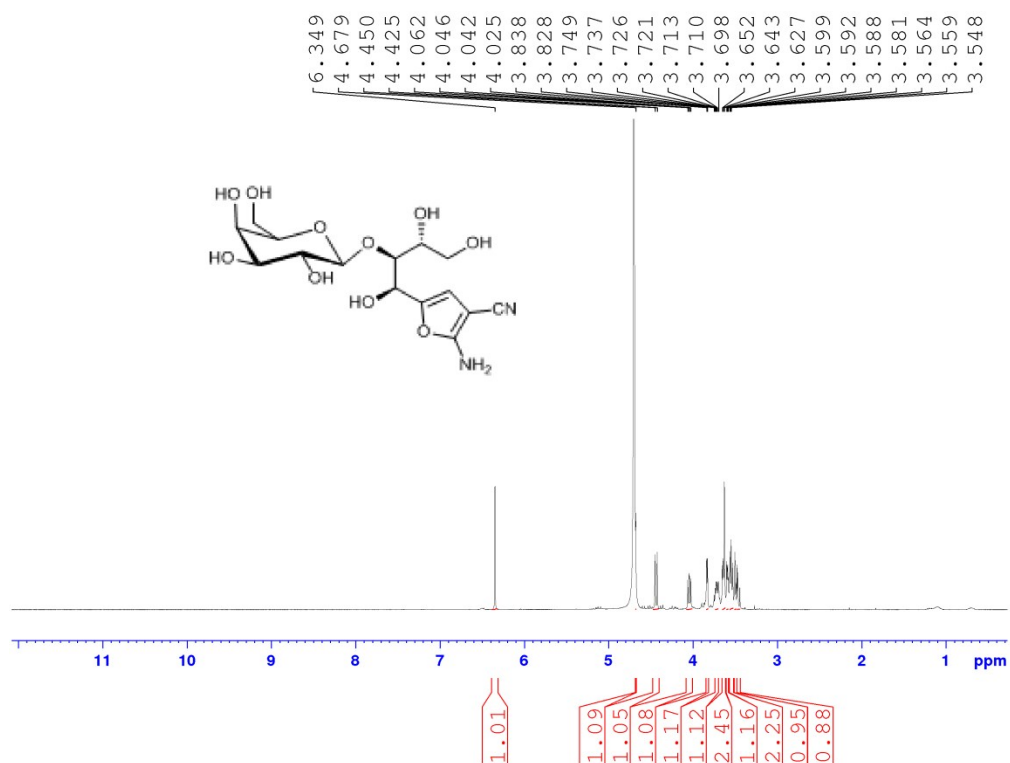

# <sup>13</sup>C NMR Spectra of compound 15a

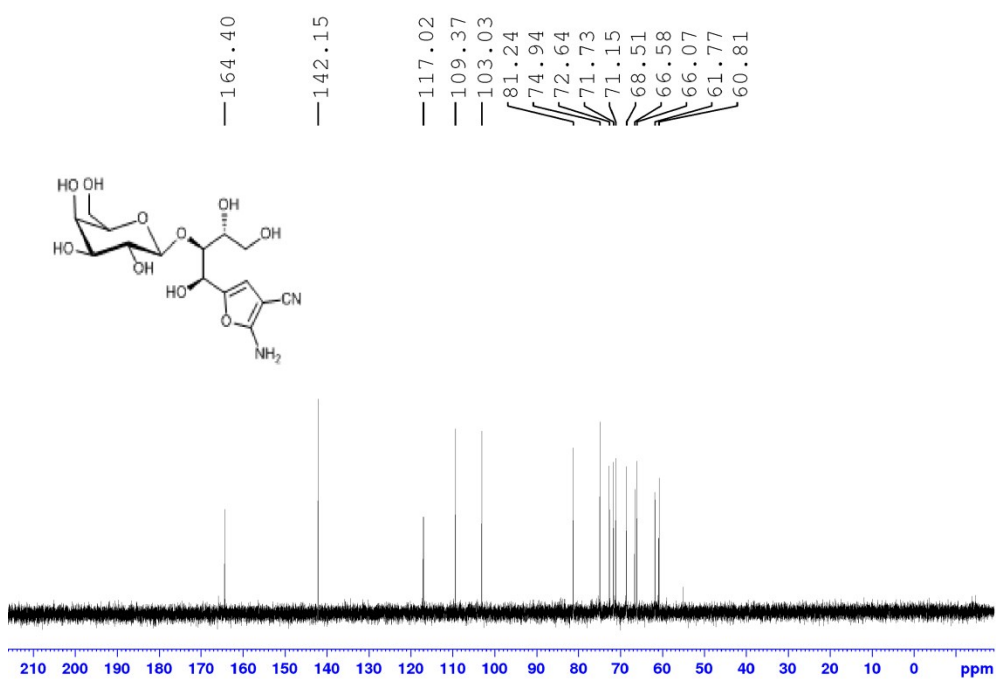



# <sup>1</sup>H NMR Spectra of compound 16a

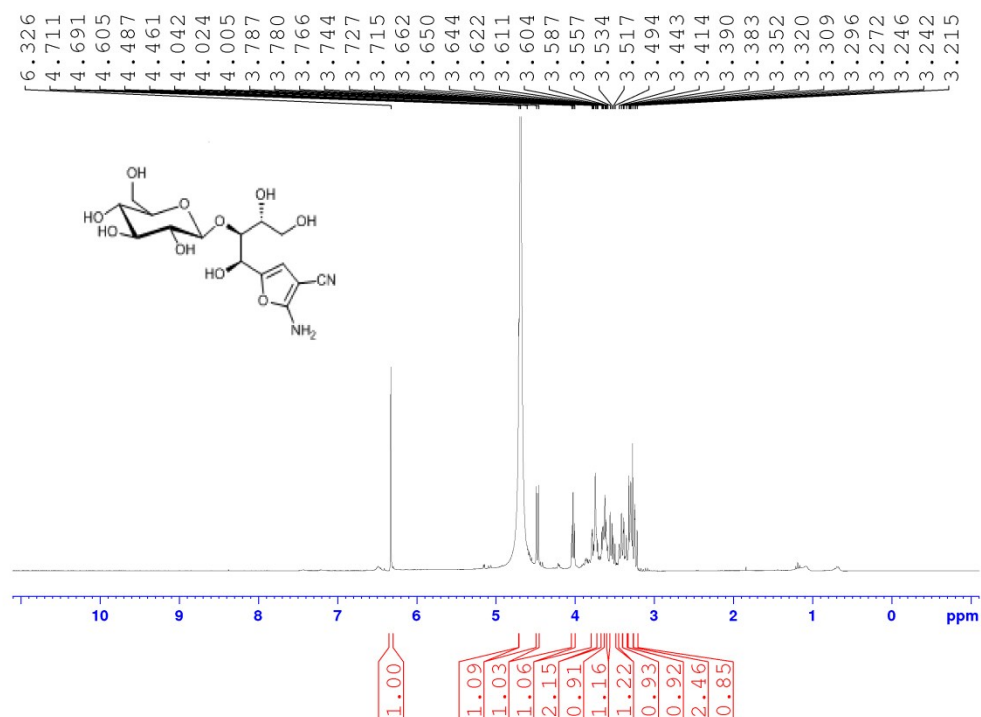

# <sup>13</sup>C NMR Spectra of compound 16a

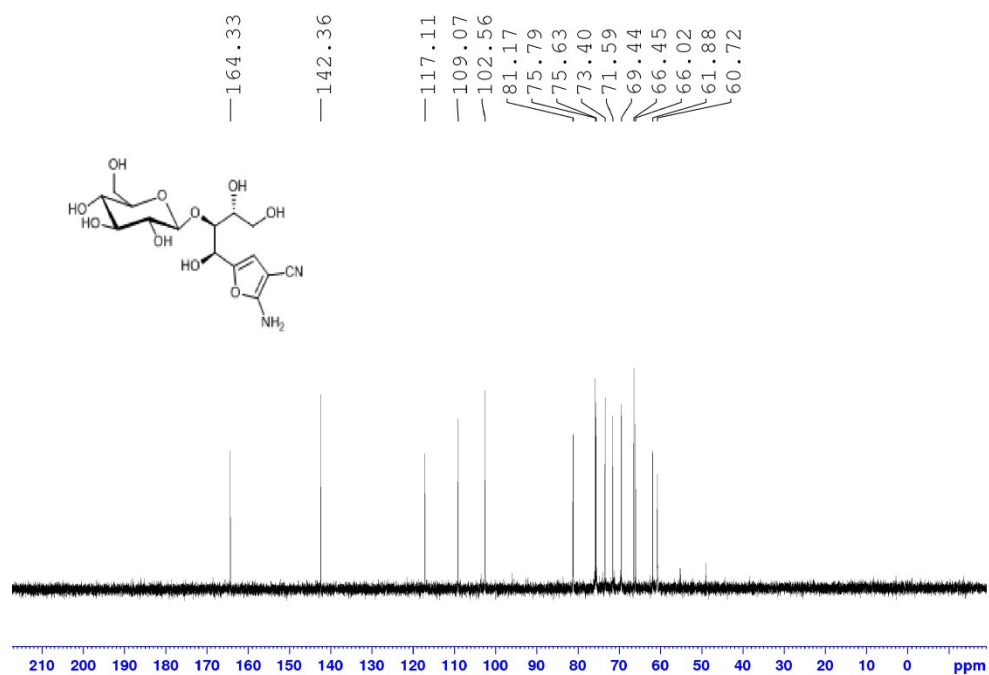

# <sup>1</sup>H NMR Spectra of compound 7c

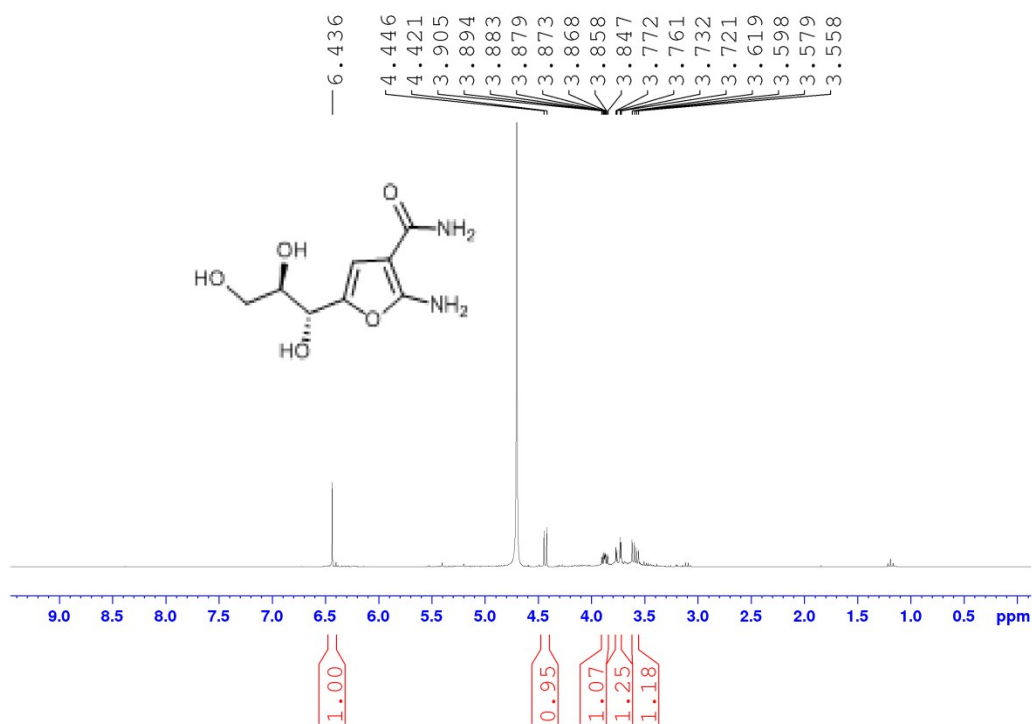

## <sup>13</sup>C NMR Spectra of compound 7c

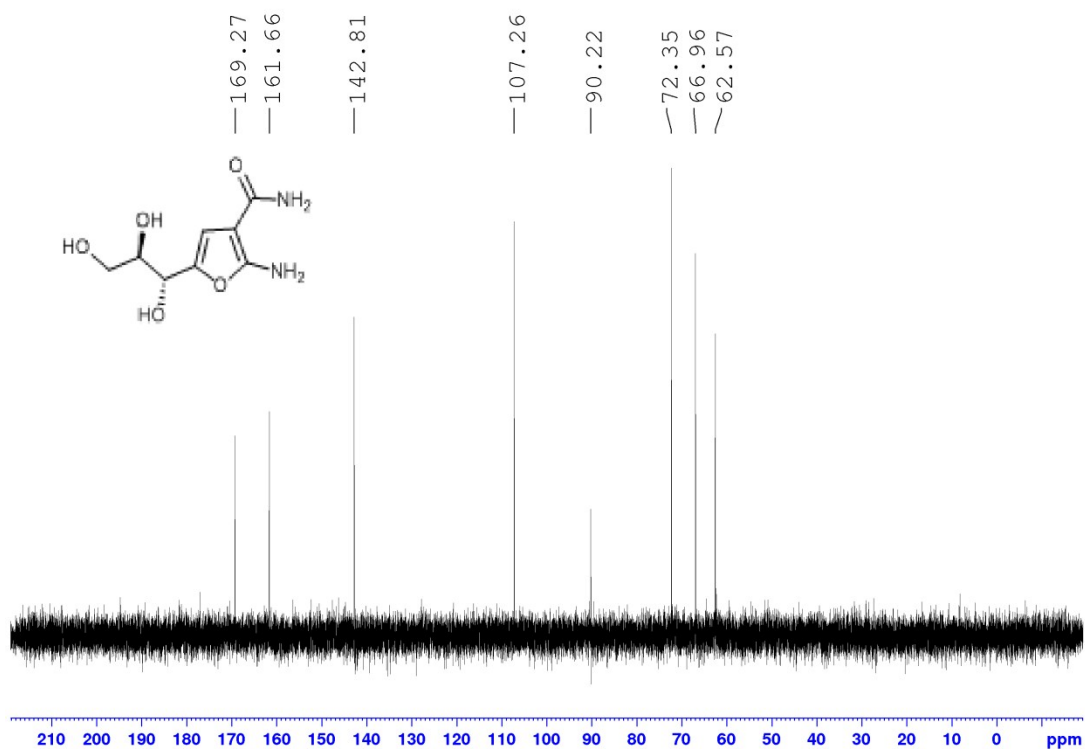

# <sup>1</sup>H NMR Spectra of compound 9c

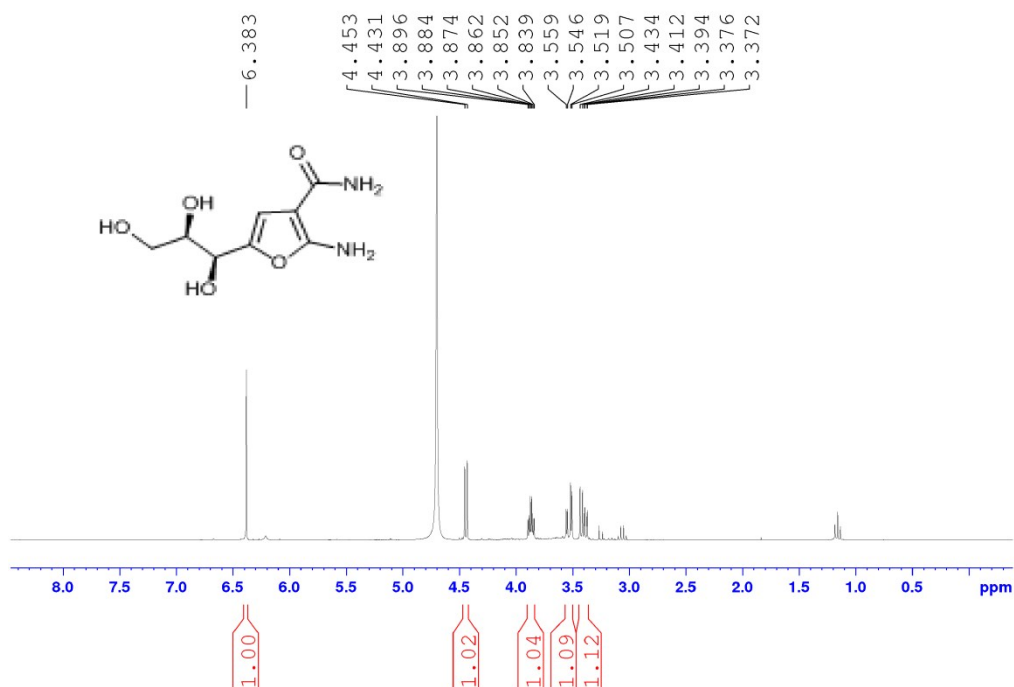

# <sup>13</sup>C NMR Spectra of compound 9c

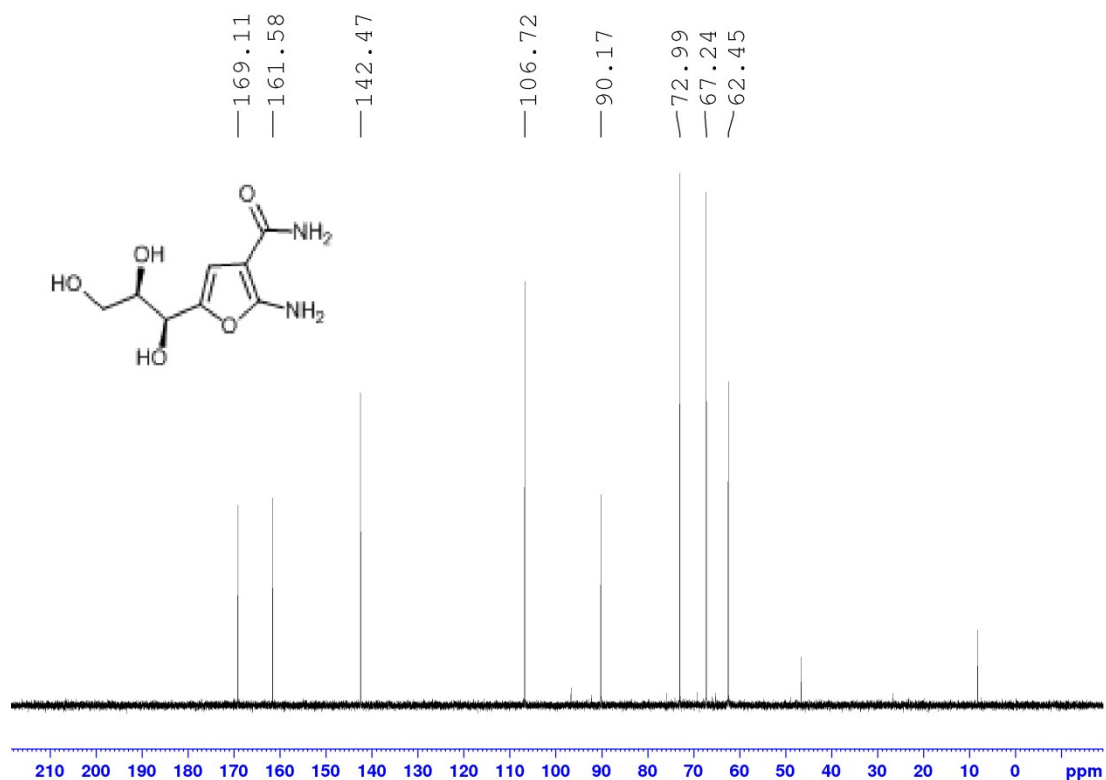

# <sup>1</sup>H NMR Spectra of compound 10c

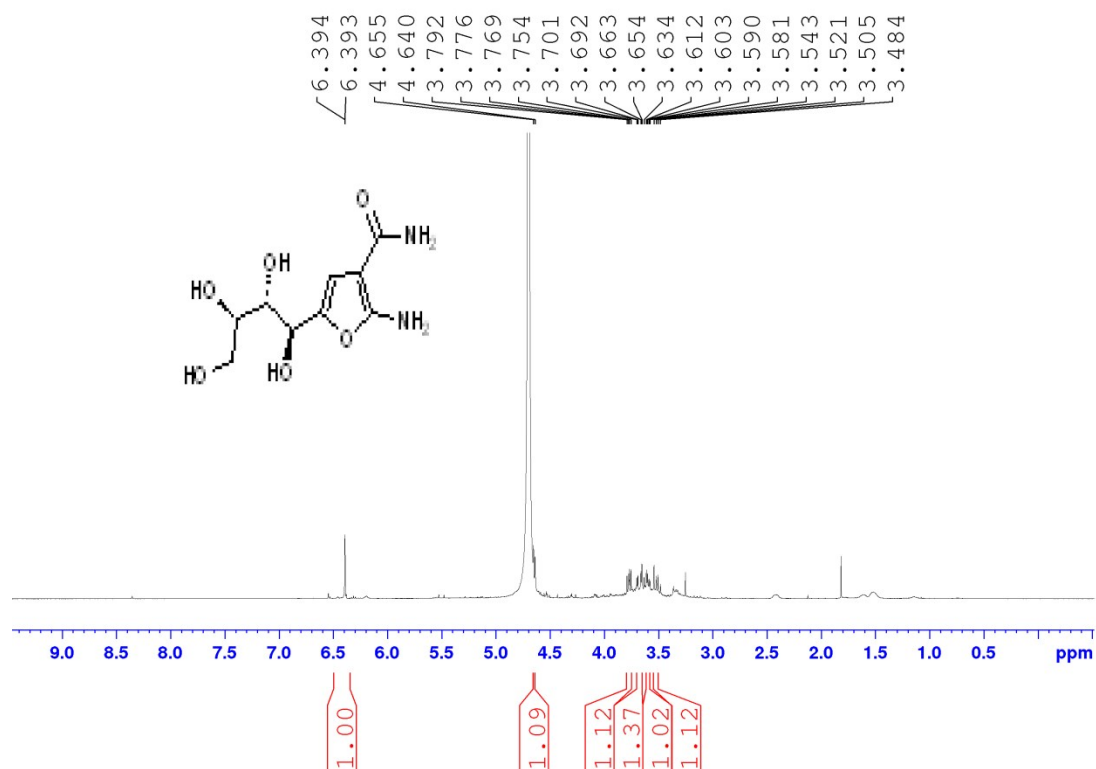

## <sup>13</sup>C NMR Spectra of compound 10c

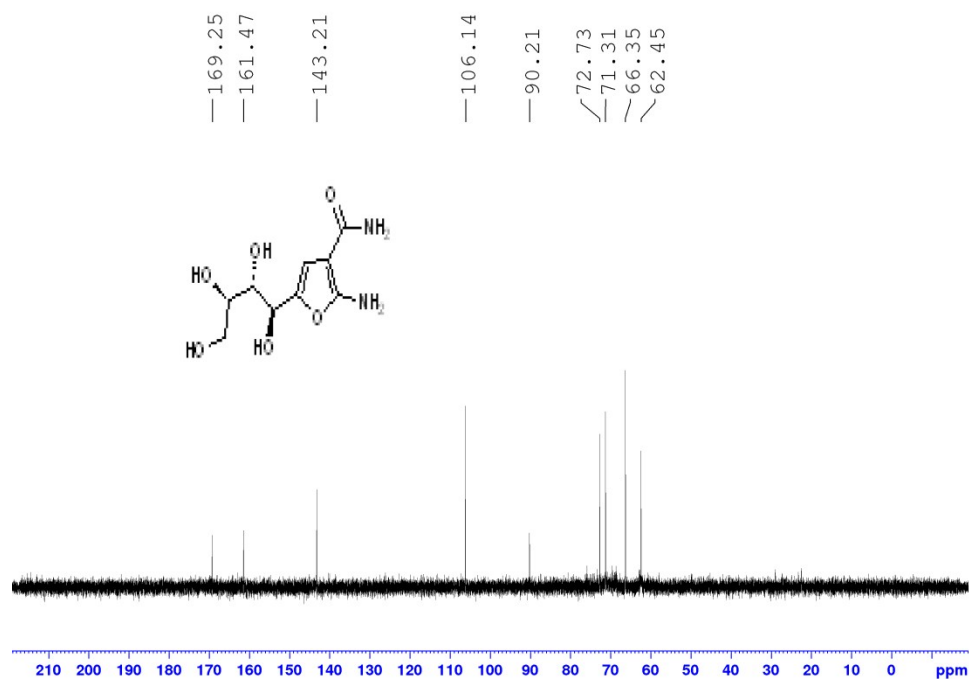

# <sup>1</sup>H NMR Spectra of compound 12c

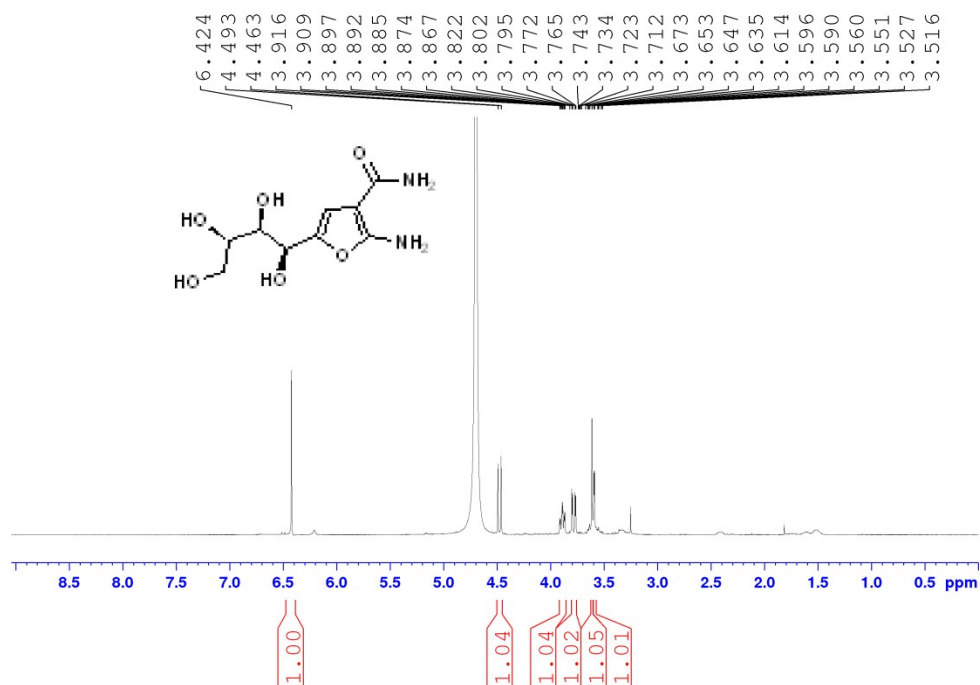

# <sup>13</sup>C NMR Spectra of compound 12c

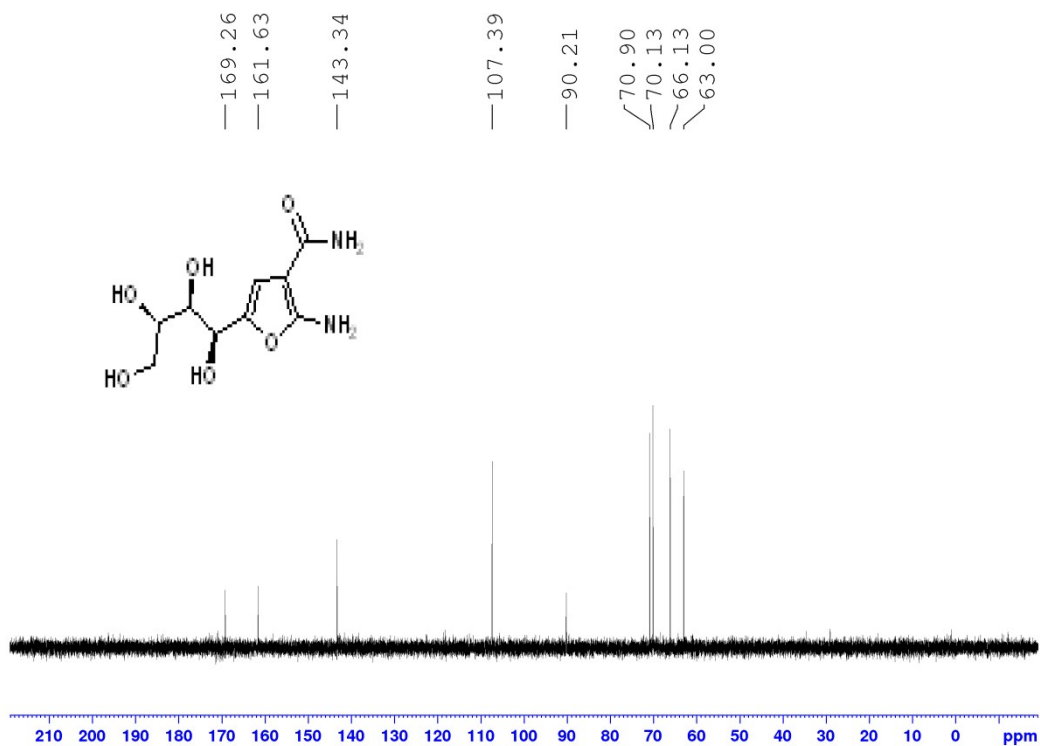

**<sup>1</sup>H NMR Spectra of compound 13c (MeOD-D4)**

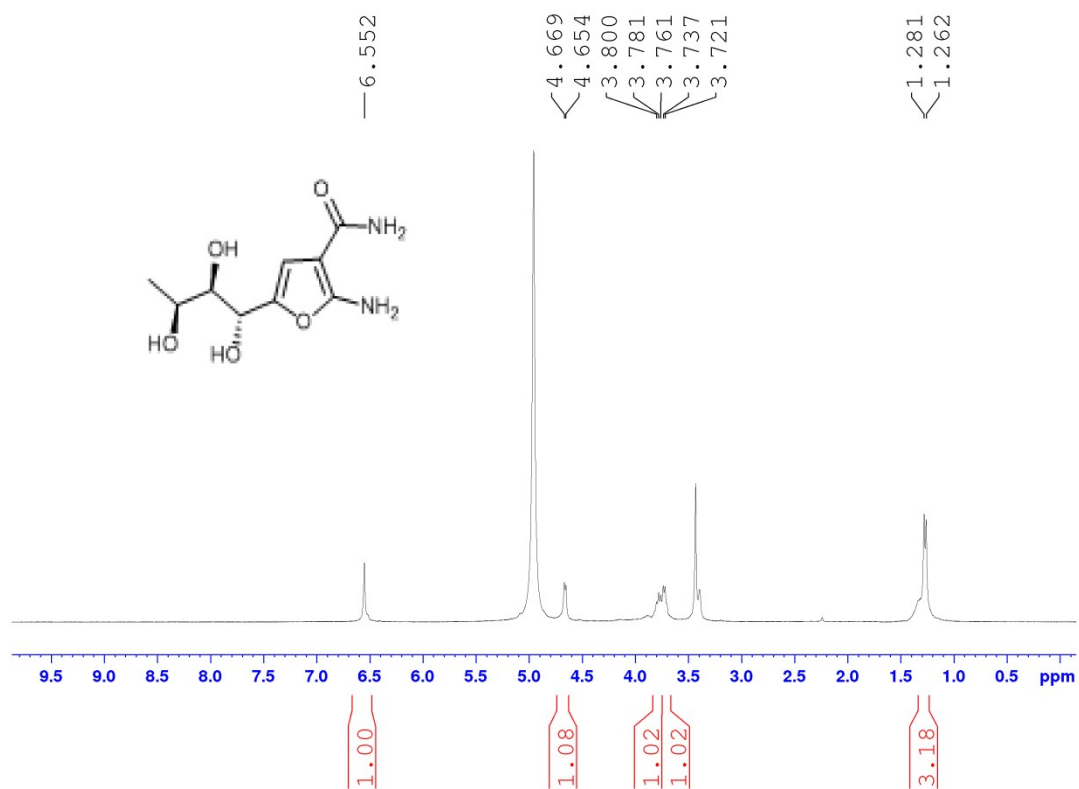

**<sup>13</sup>C NMR Spectra of compound 13c (MeOD-D4)**

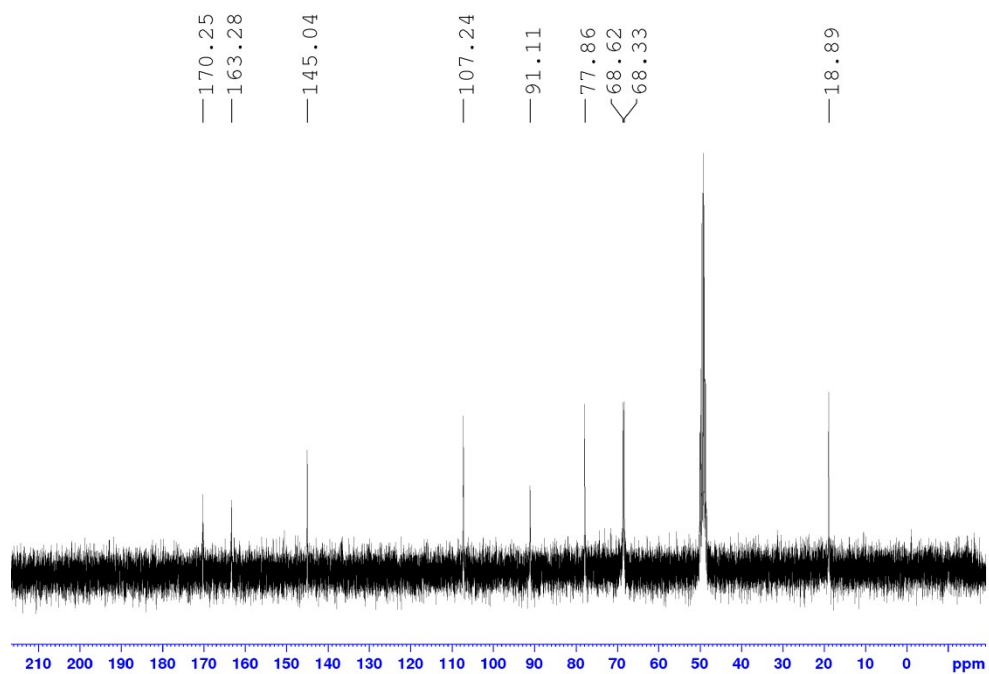

# <sup>1</sup>H NMR Spectra of compound 14c

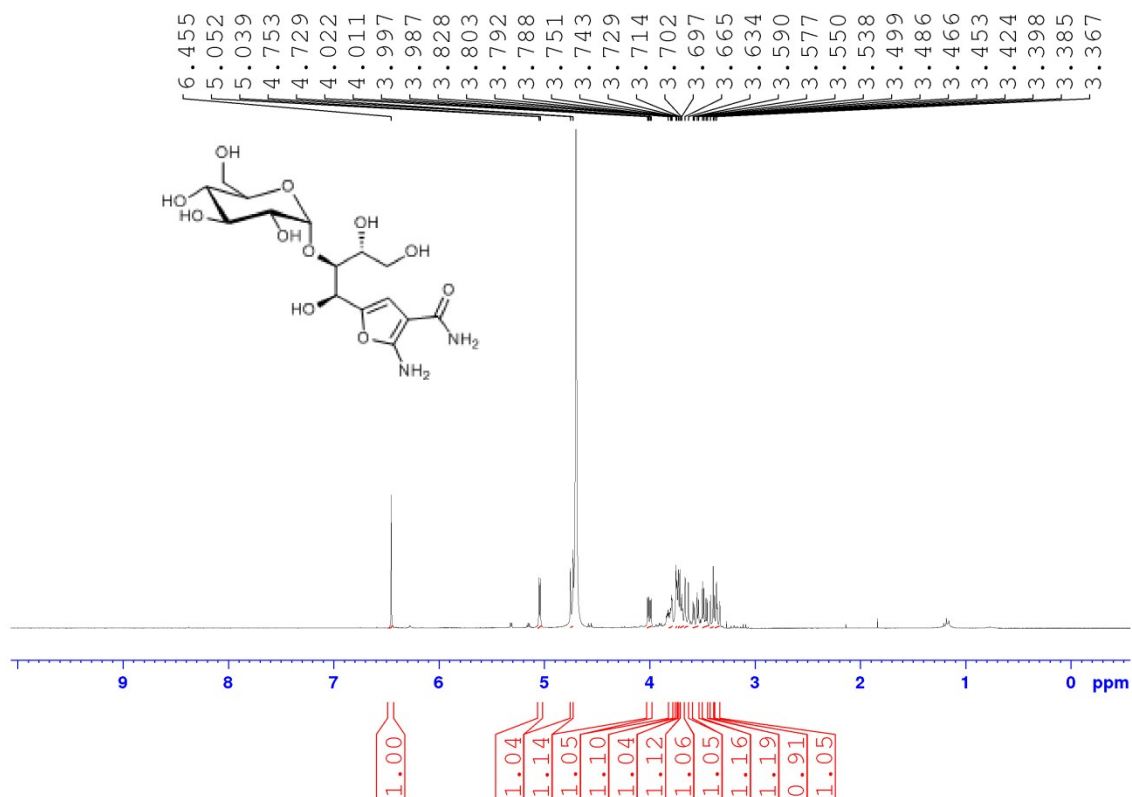

# <sup>13</sup>C NMR Spectra of compound 14c

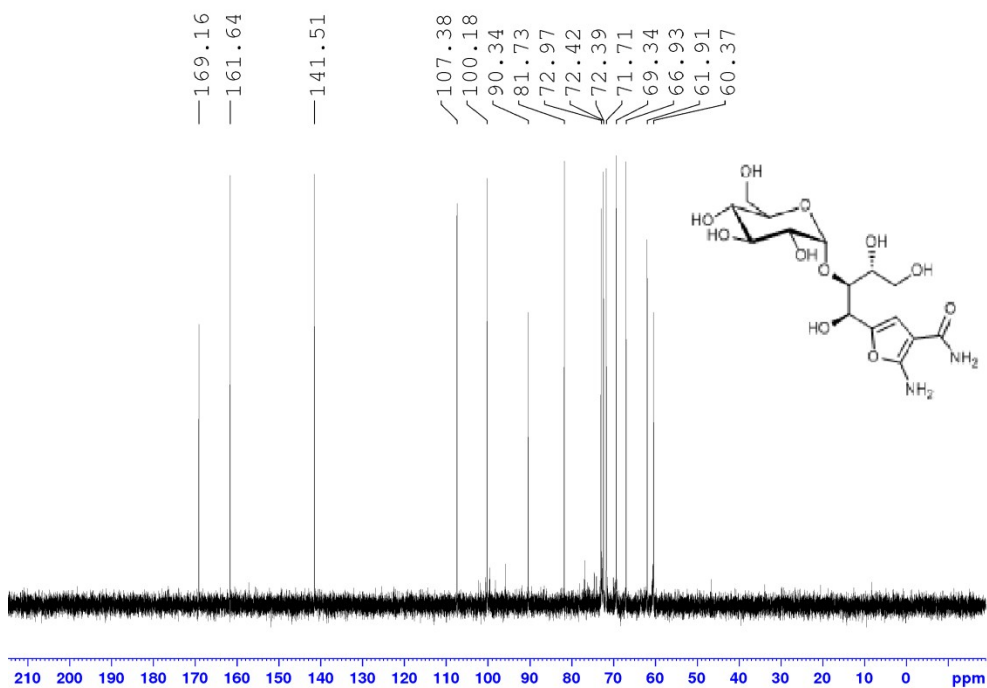

# <sup>1</sup>H NMR Spectra of compound 15c

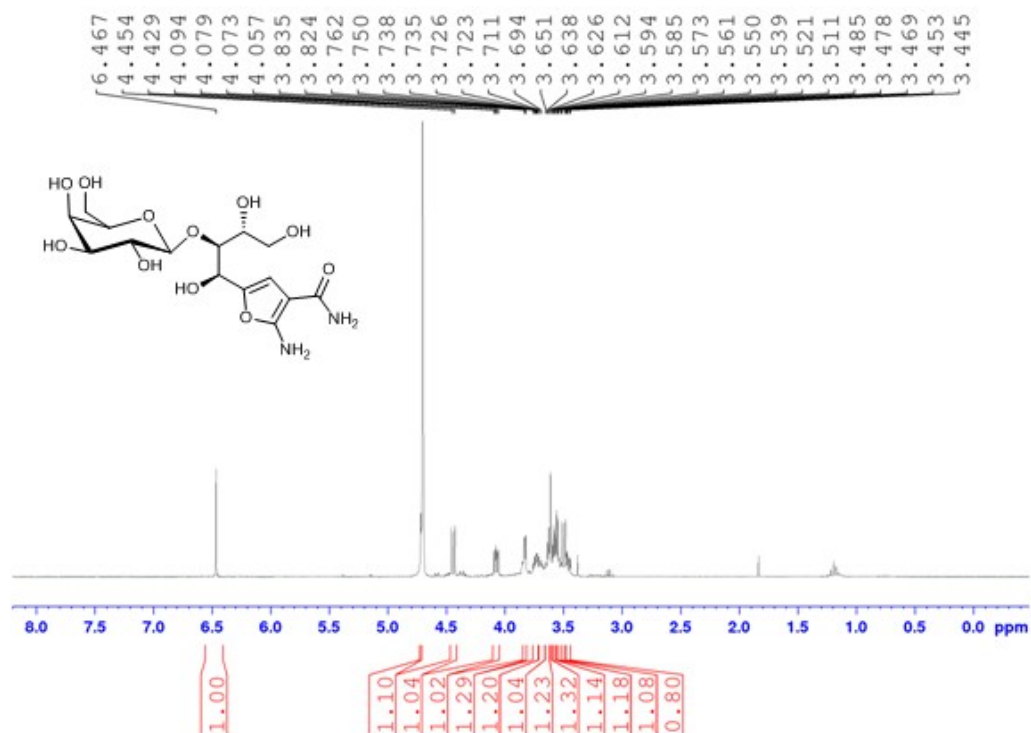

## <sup>13</sup>C NMR Spectra of compound 15c

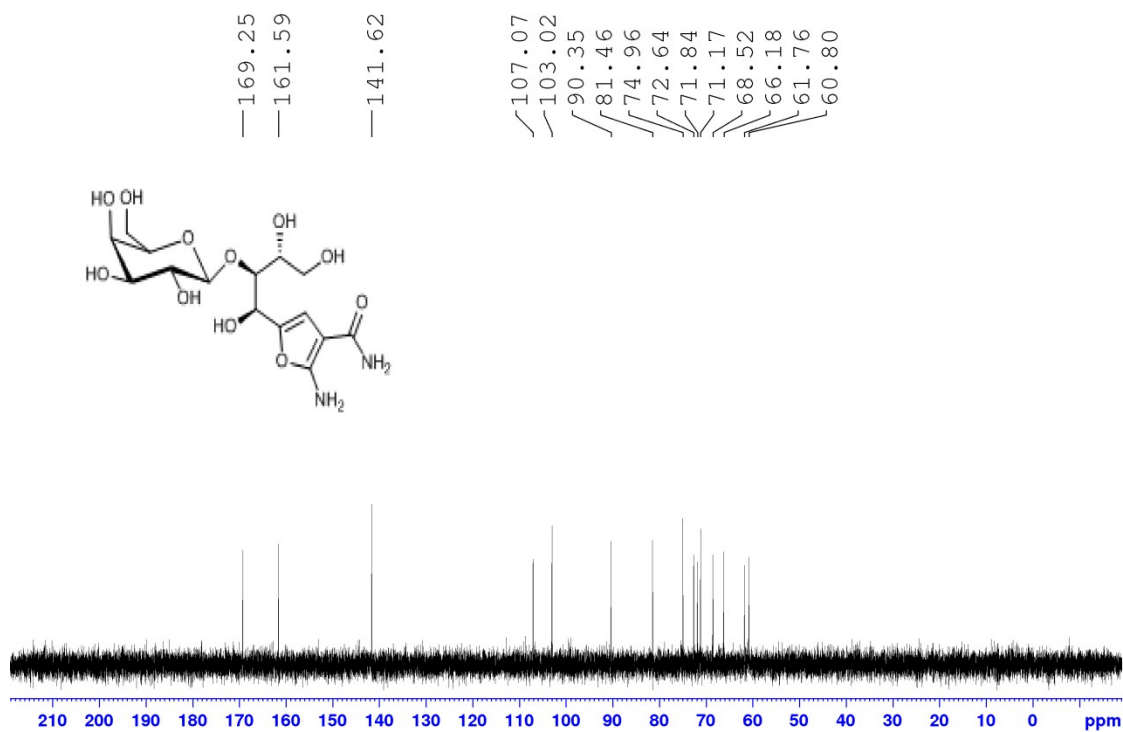



# <sup>1</sup>H NMR Spectra of compound 16c

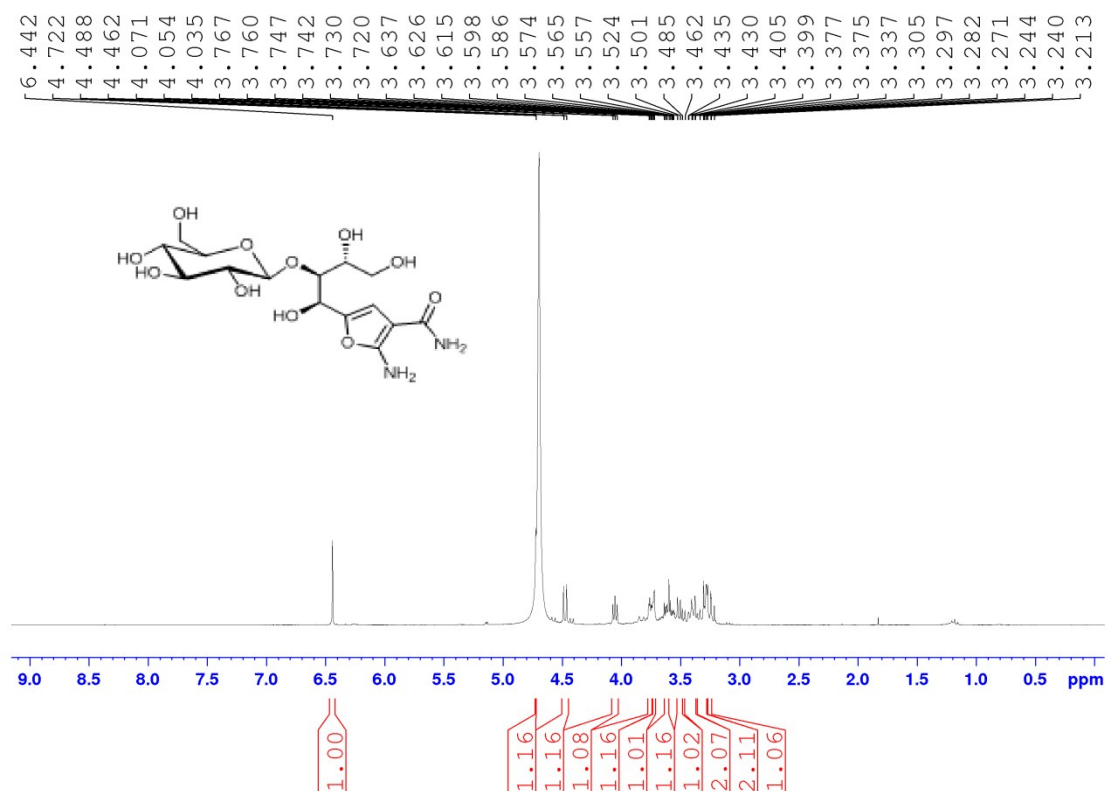

# <sup>13</sup>C NMR Spectra of compound 16c

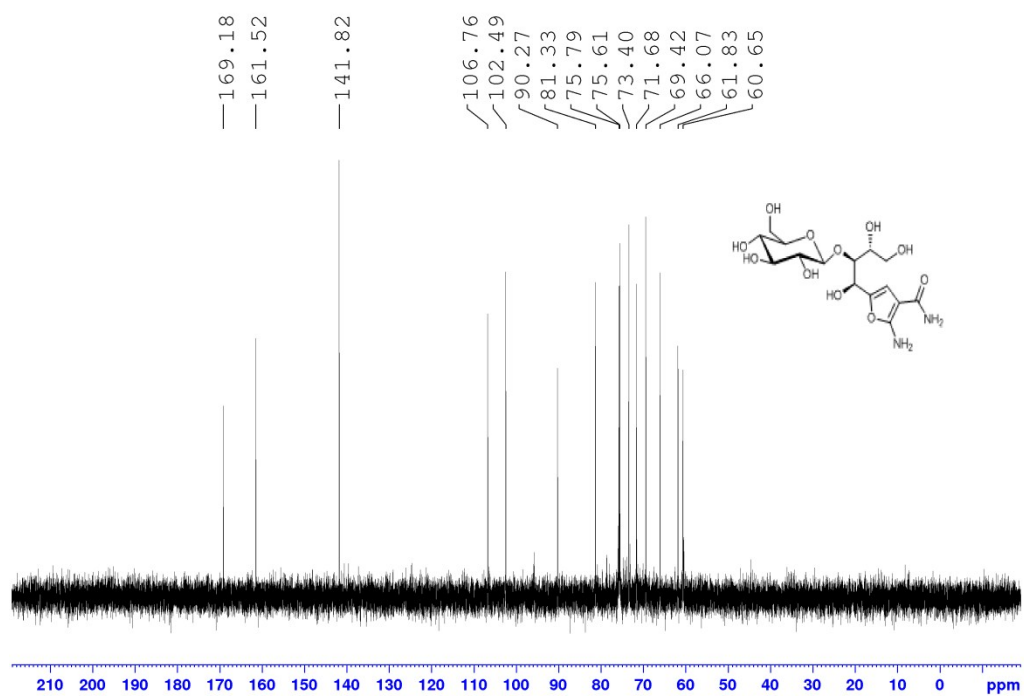

# <sup>1</sup>H NMR Spectra of compound 18

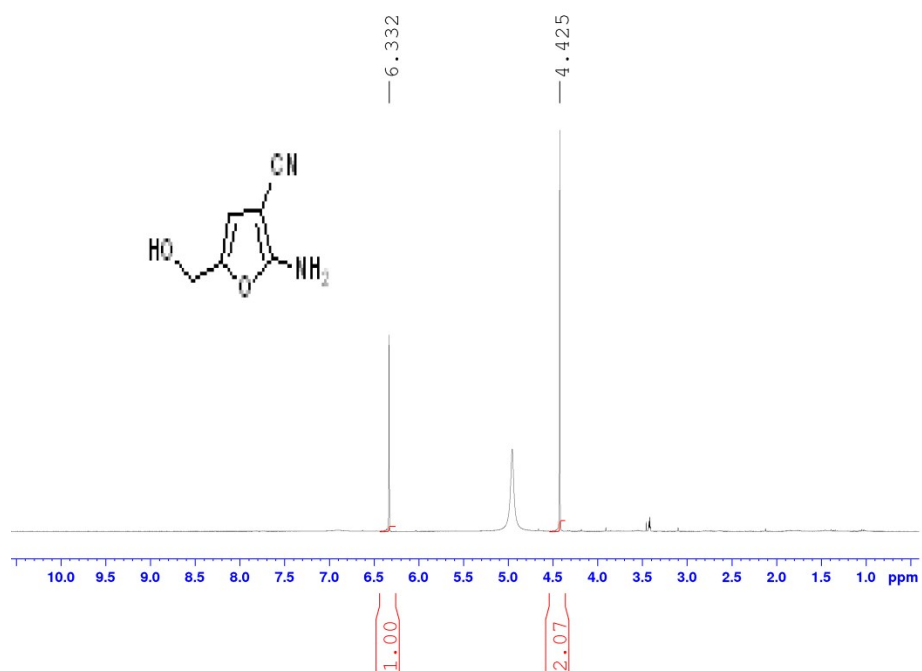

## <sup>13</sup>C NMR Spectra of compound 18

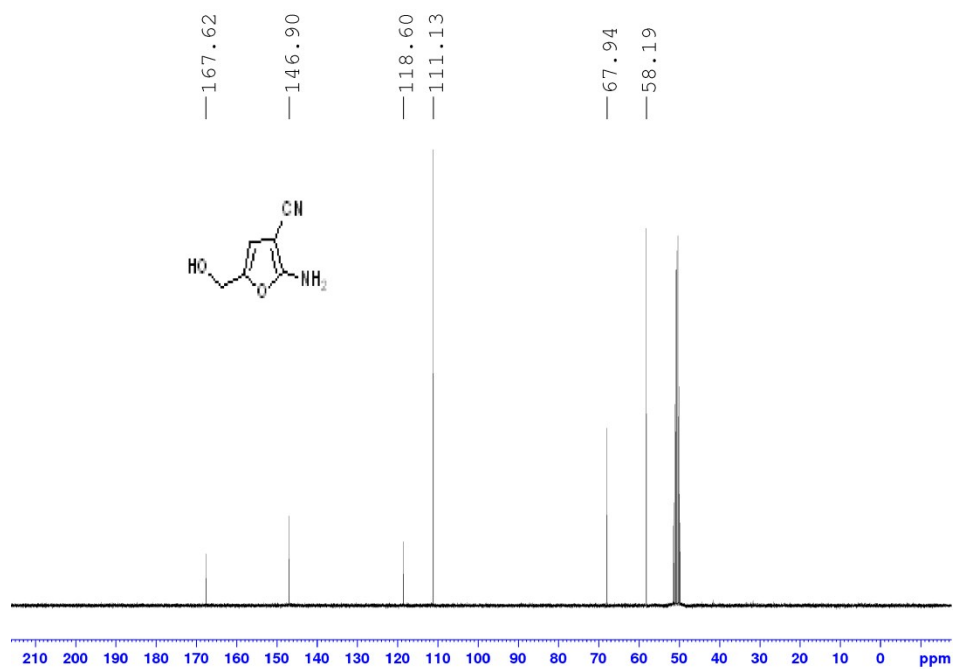

### <sup>1</sup>H NMR Spectra of intermediate III

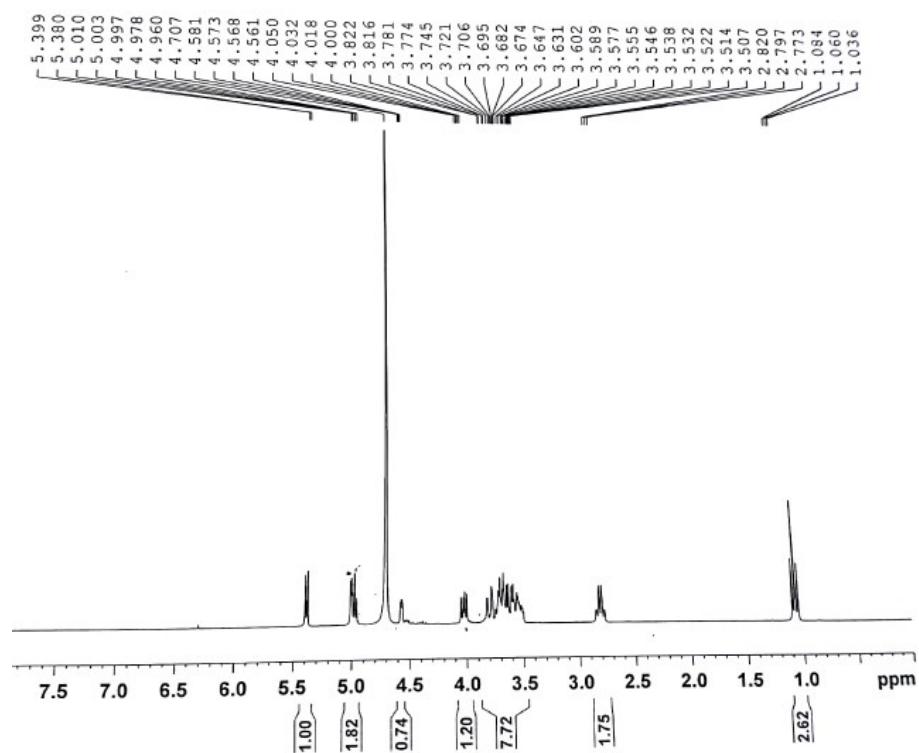

### <sup>13</sup>C NMR Spectra of intermediate III

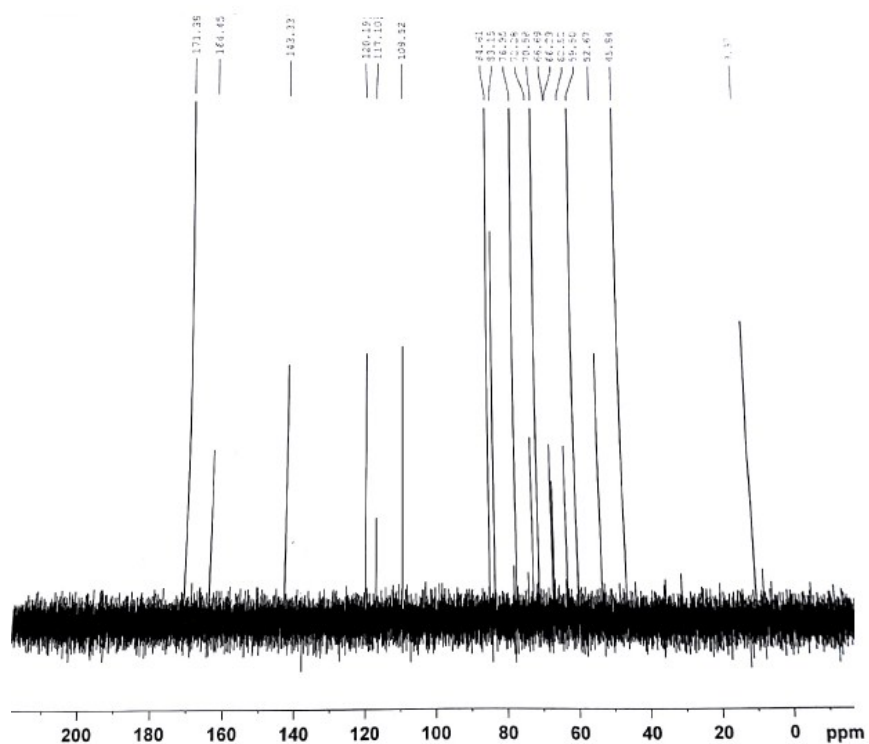

DEPT-135 Spectra of intermediate III

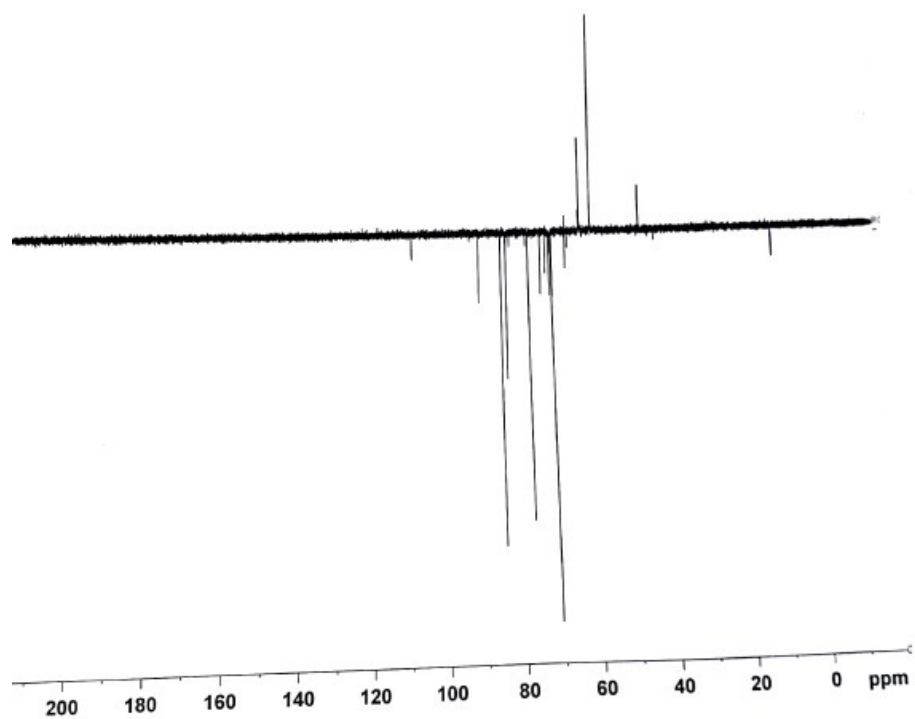

<sup>1</sup>H NMR of the reaction between D-(+)- ribose, malononitrile with Et<sub>3</sub>N (15 mol%) in D<sub>2</sub>O after 20 m

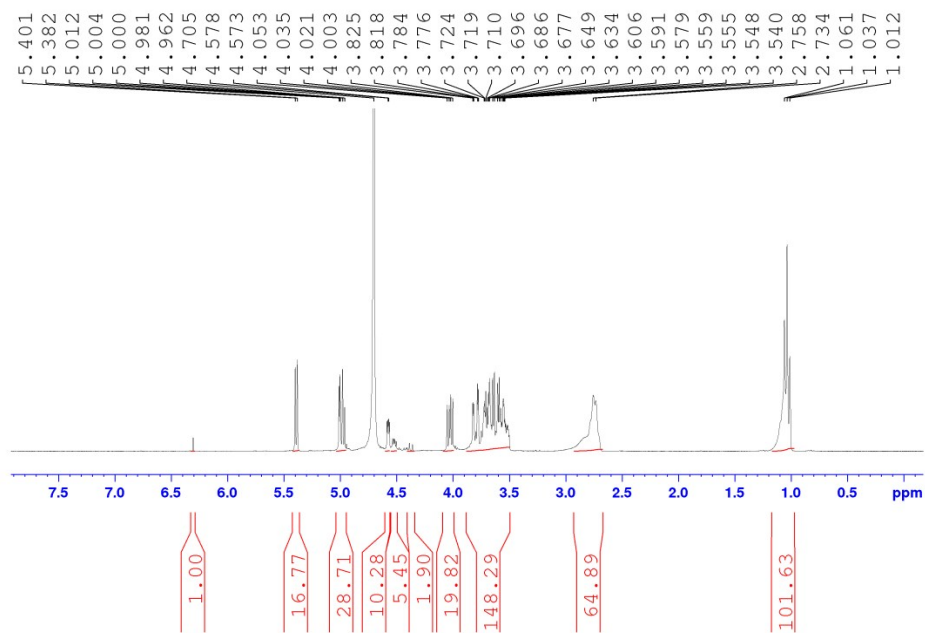

<sup>1</sup>H NMR of the reaction between D-(+)- ribose, malononitrile with Et<sub>3</sub>N (15 mol%) in D<sub>2</sub>O after 40 m

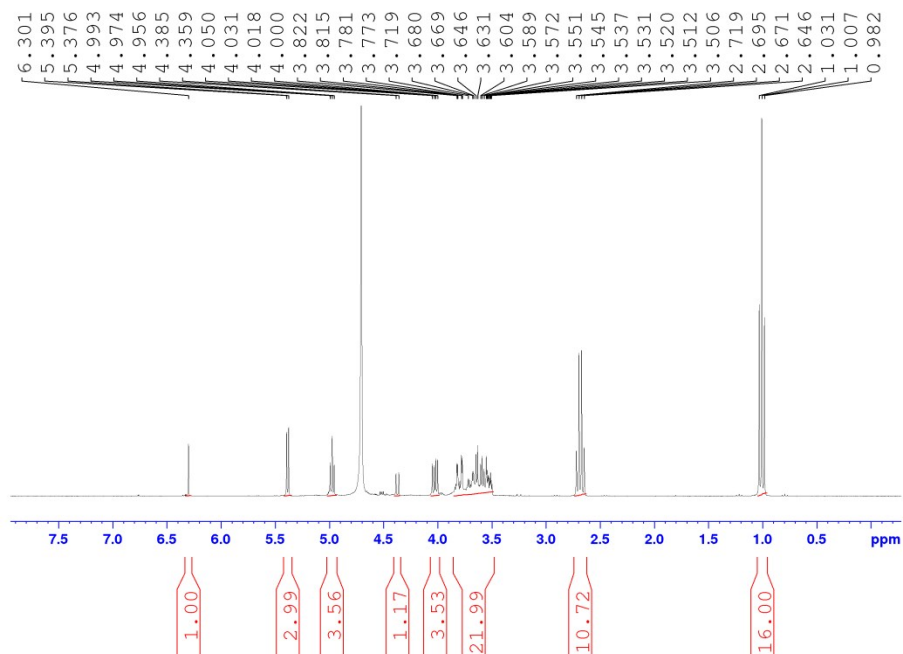

**$^1\text{H}$  NMR of the reaction between D-(+)- ribose, malononitrile with  $\text{Et}_3\text{N}$  (15 mol%) in  $\text{D}_2\text{O}$  after 60 m**

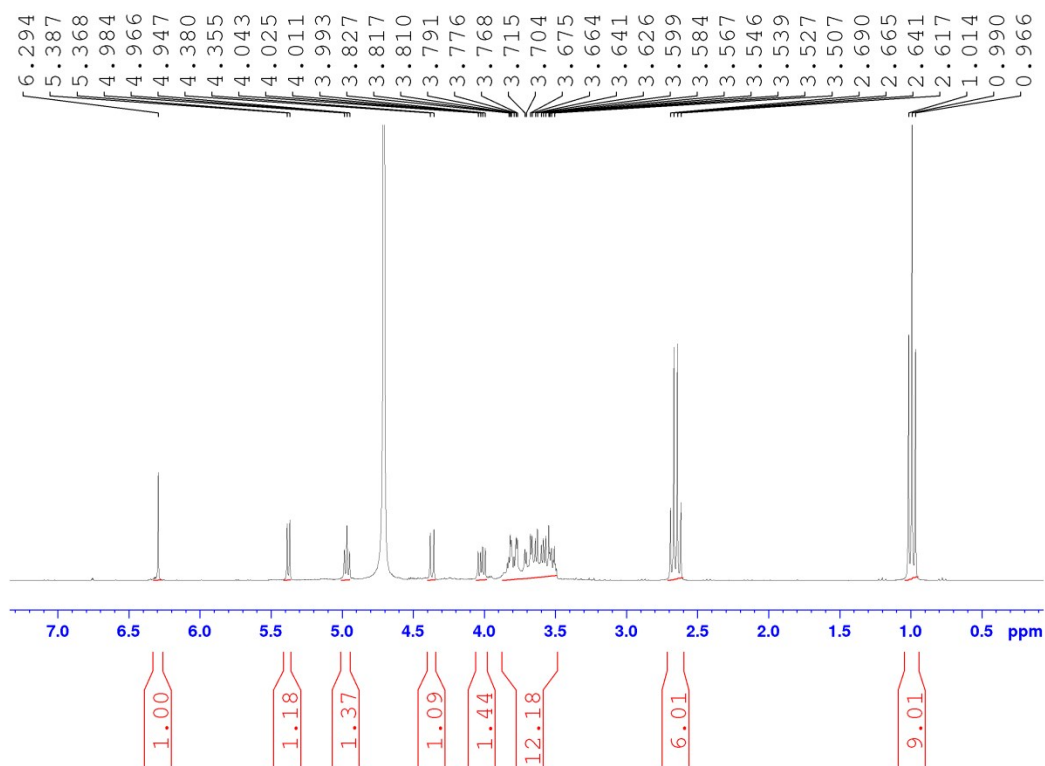

**$^1\text{H}$  NMR of the reaction between D-(+)- ribose, malononitrile with  $\text{Et}_3\text{N}$  (15 mol%) in  $\text{D}_2\text{O}$  after 80 m**

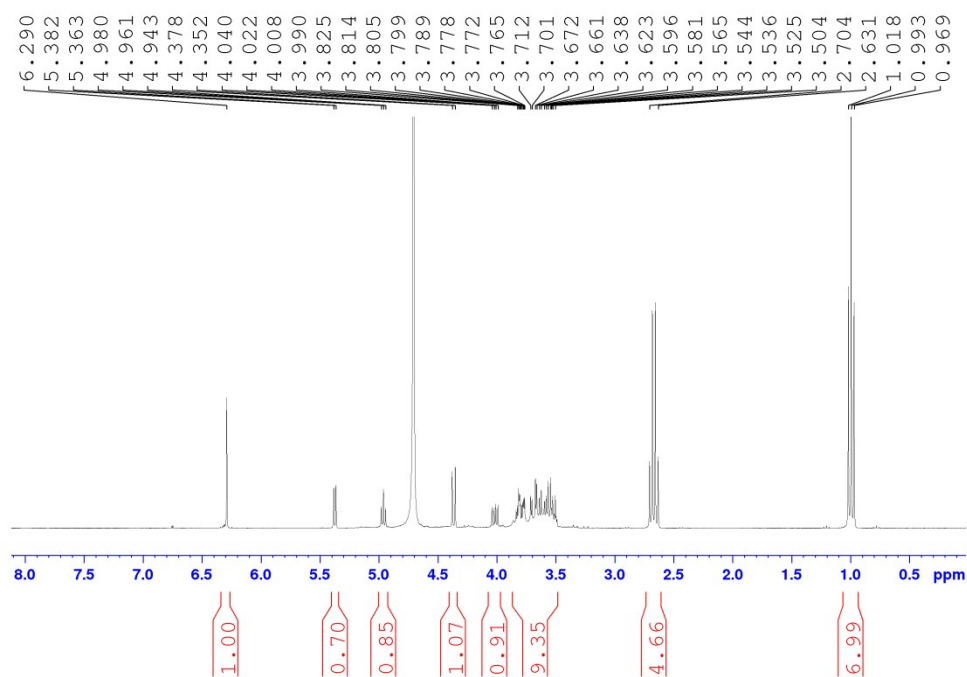

**$^1\text{H}$  NMR of the reaction between D-(+)- ribose, malononitrile with  $\text{Et}_3\text{N}$  (15 mol%) in  $\text{D}_2\text{O}$  after 100 m**

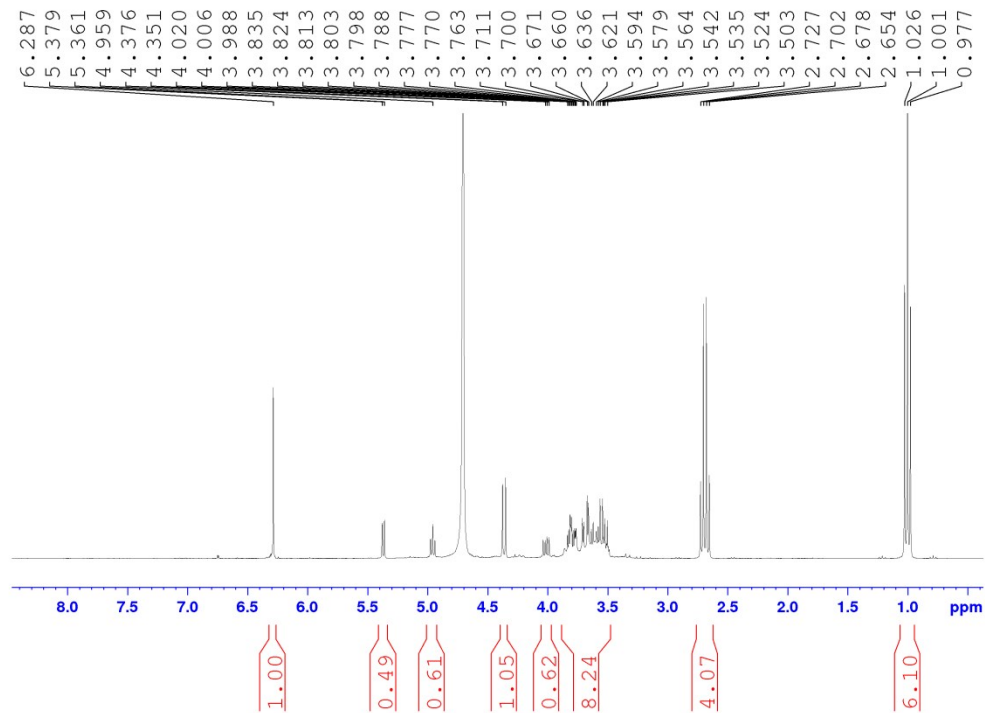

**$^1\text{H}$  NMR of the reaction between D-(+)- ribose, malononitrile with  $\text{Et}_3\text{N}$  (15 mol%) in  $\text{D}_2\text{O}$  after 120 m**

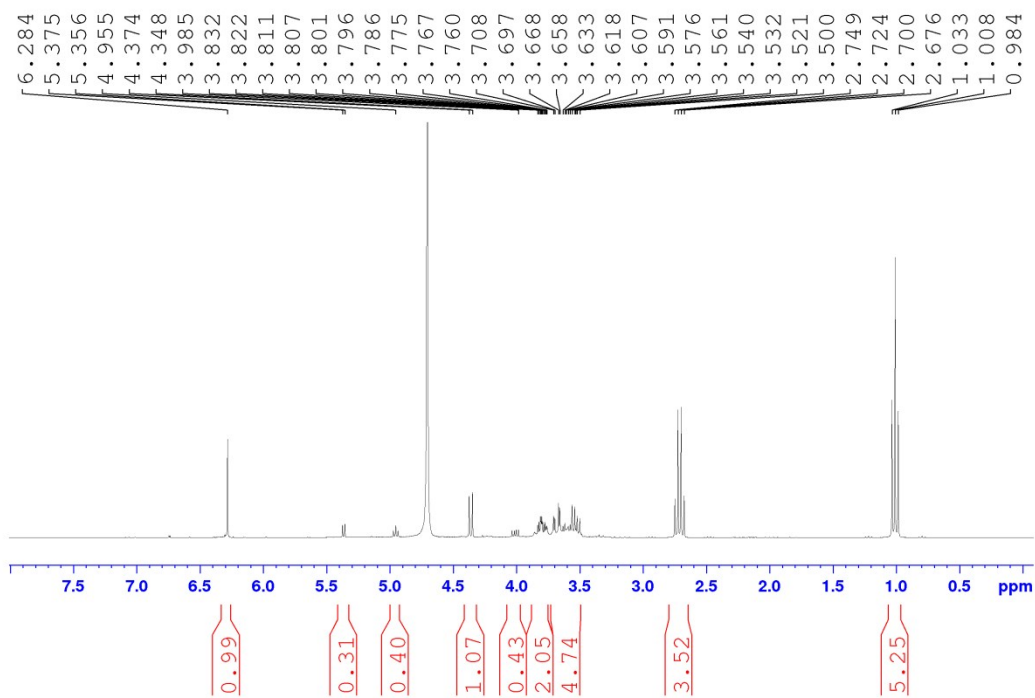

**$^1\text{H}$  NMR of the reaction between D-(+)- ribose, malononitrile with  $\text{Et}_3\text{N}$  (15 mol%) in  $\text{D}_2\text{O}$  after 140 m**

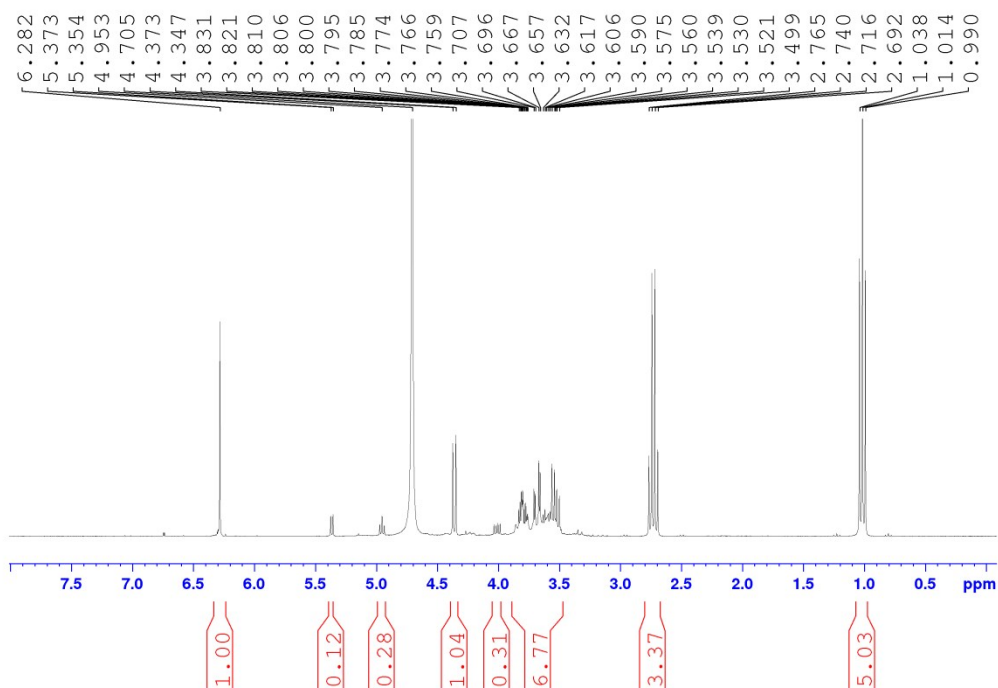

**$^1\text{H}$  NMR of the reaction between D-(+)- ribose, malononitrile with  $\text{Et}_3\text{N}$  (15 mol%) in  $\text{D}_2\text{O}$  after 160 m**

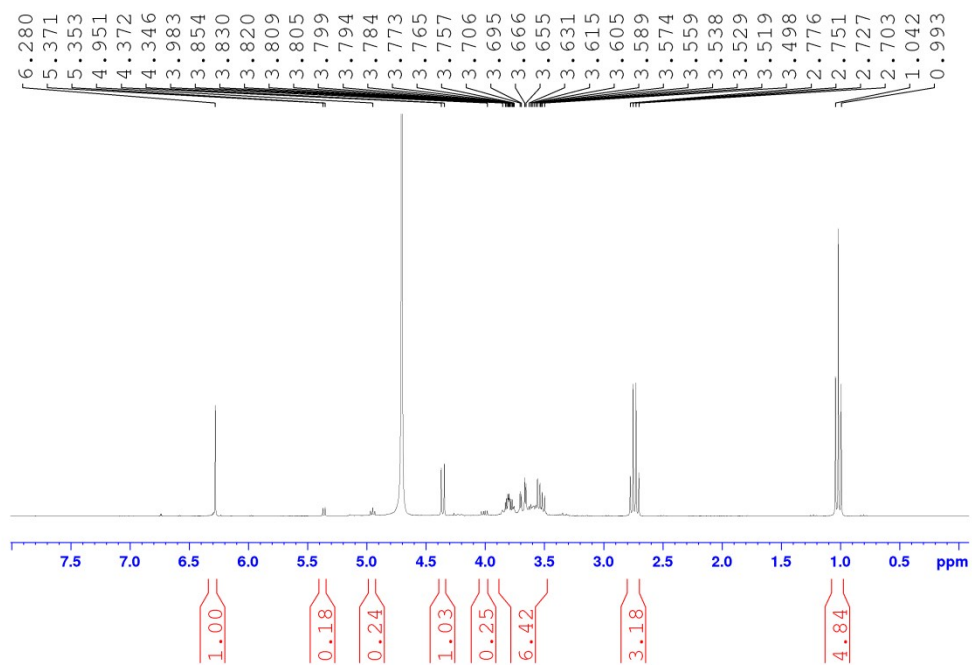



**$^1\text{H}$  NMR of the reaction between D-(+)- ribose, malononitrile with  $\text{Et}_3\text{N}$  (15 mol%) in  $\text{D}_2\text{O}$  after 180 m**

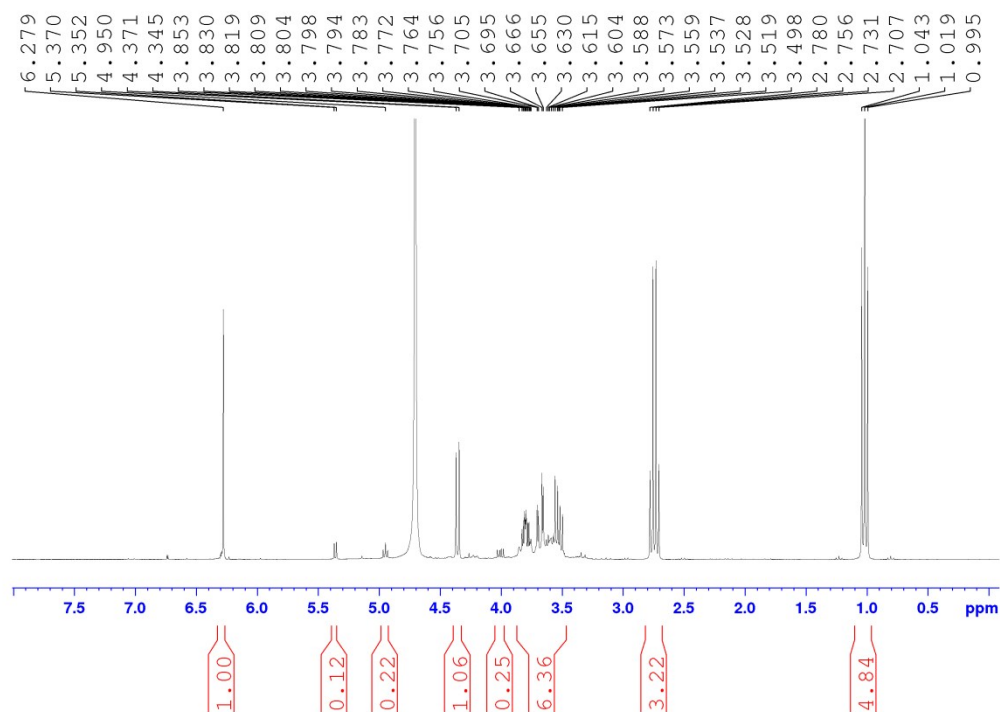

**$^1\text{H}$  NMR of the reaction between D-(+)- ribose, malononitrile with  $\text{Et}_3\text{N}$  (15 mol%) in  $\text{D}_2\text{O}$  after 4 h**

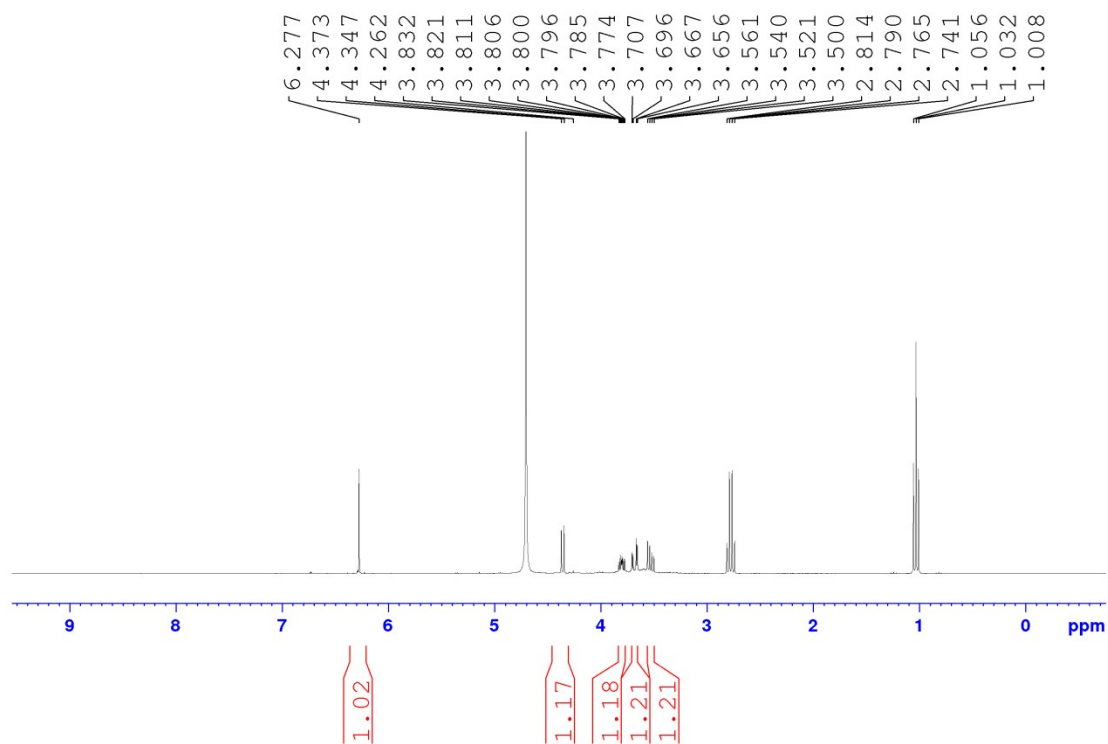

**$^1\text{H}$  NMR of the reaction between D-(+)- ribose, malononitrile with DBU (15 mol% ) in  $\text{D}_2\text{O}$  after 20 m**

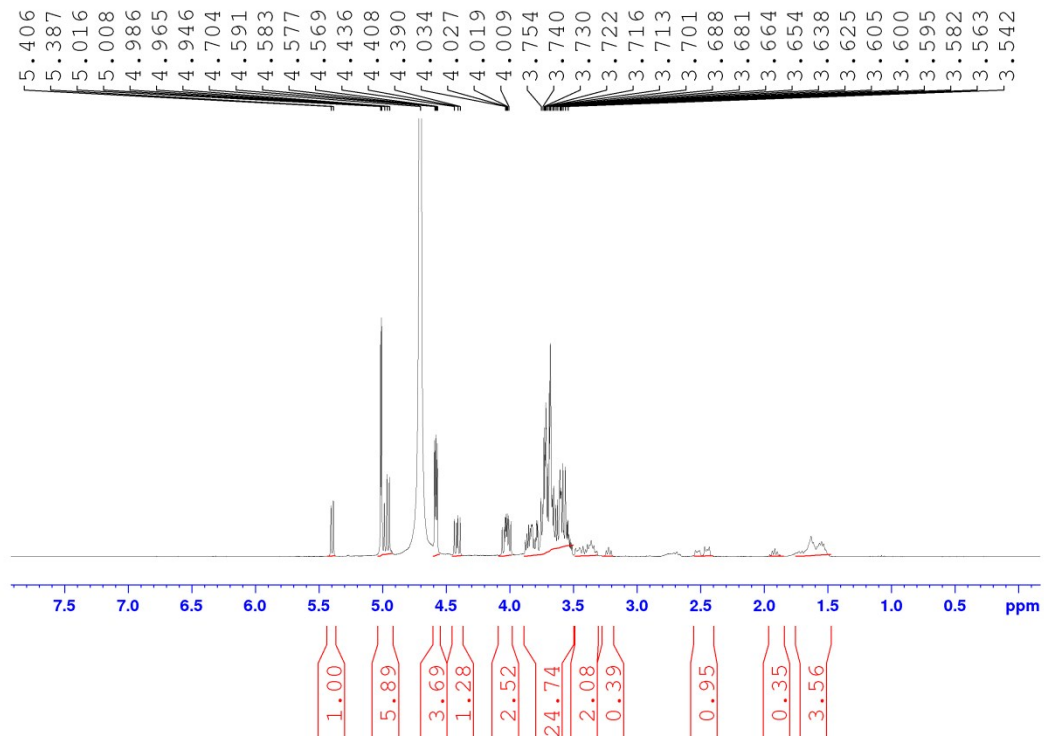

**$^1\text{H}$  NMR of the reaction between D-(+)- ribose, malononitrile with DBU (15 mol% ) in  $\text{D}_2\text{O}$  after 40 m**

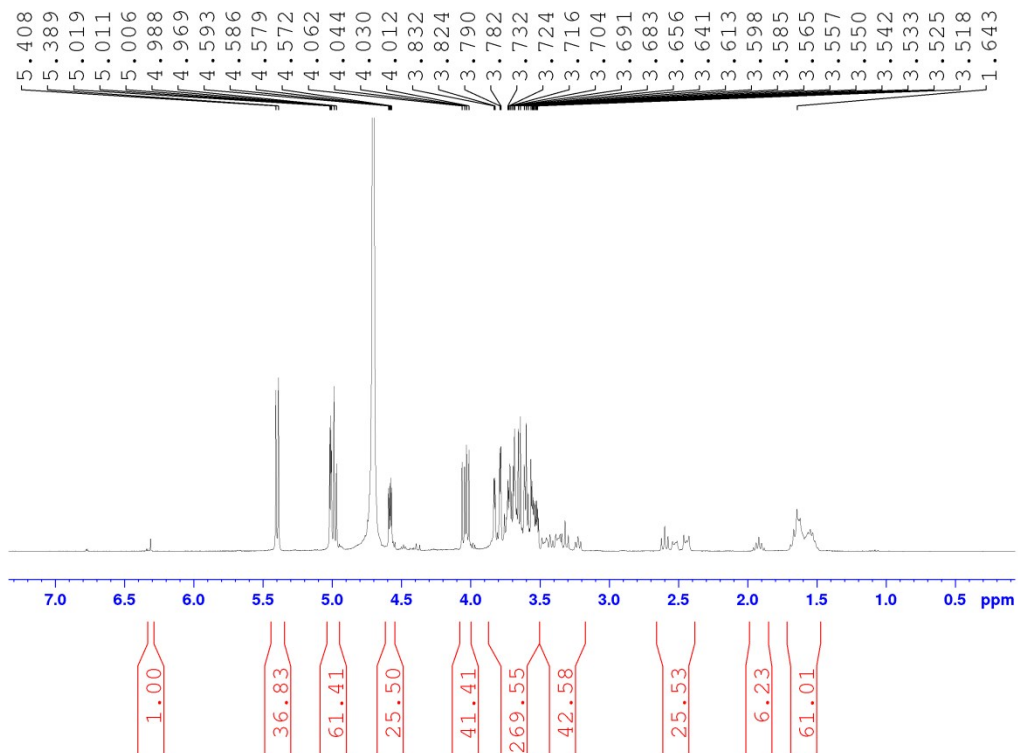

**$^1\text{H}$  NMR of the reaction between D-(+)- ribose, malononitrile with DBU (15 mol%) in  $\text{D}_2\text{O}$  after 60 m**

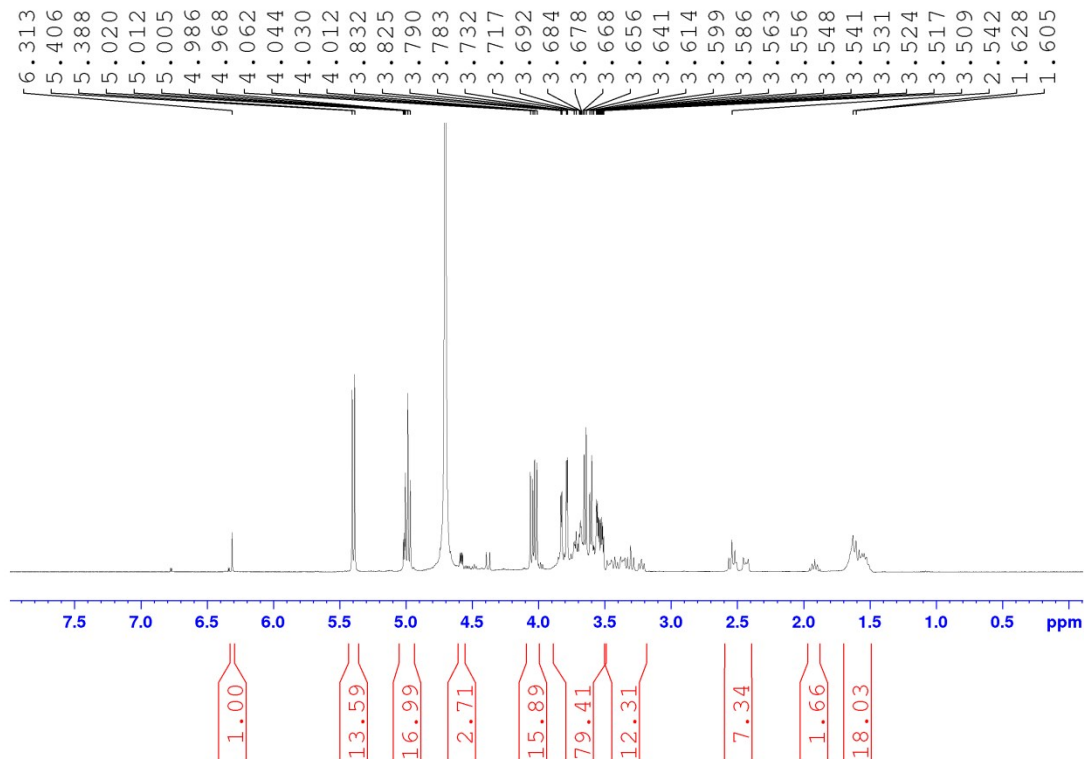

**$^1\text{H}$  NMR of the reaction between D-(+)- ribose, malononitrile with DBU (15 mol%) in  $\text{D}_2\text{O}$  after 80 m**

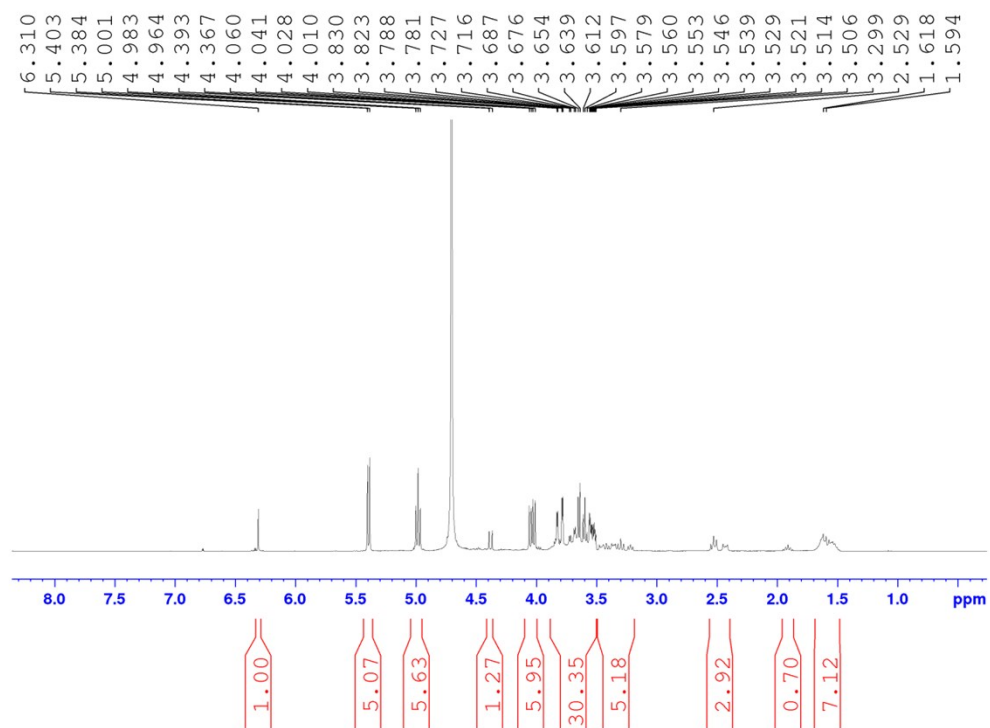

**<sup>1</sup>H NMR of the reaction between D-(+)- ribose, malononitrile with DBU (15 mol% ) in D<sub>2</sub>O after 100 m**

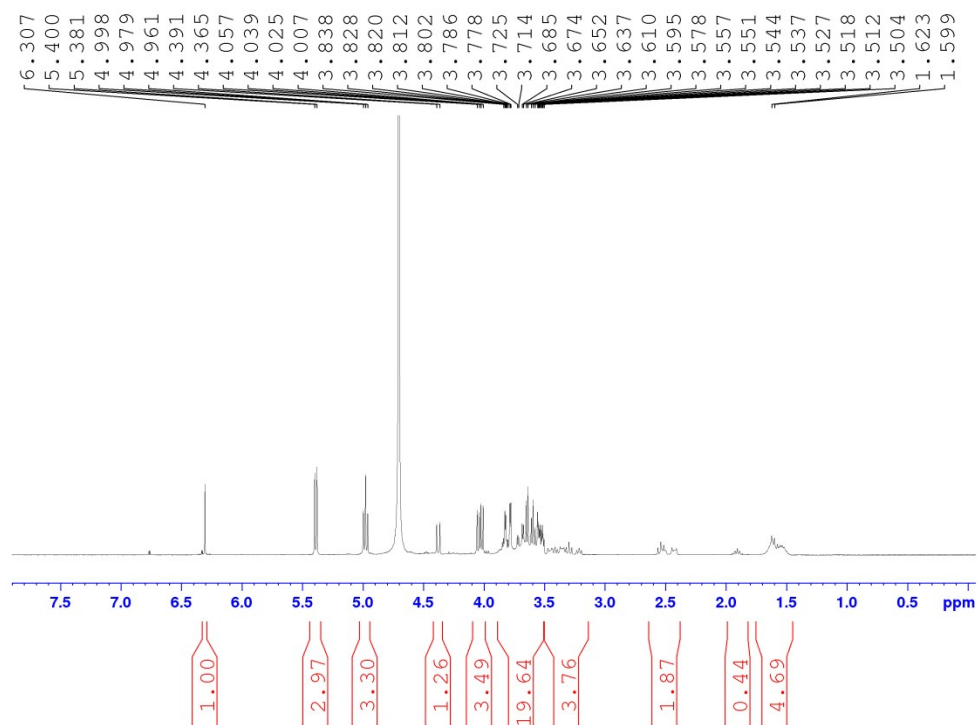

**<sup>1</sup>H NMR of the reaction between D-(+)- ribose, malononitrile with DBU (15 mol% ) in D<sub>2</sub>O after 120 m**

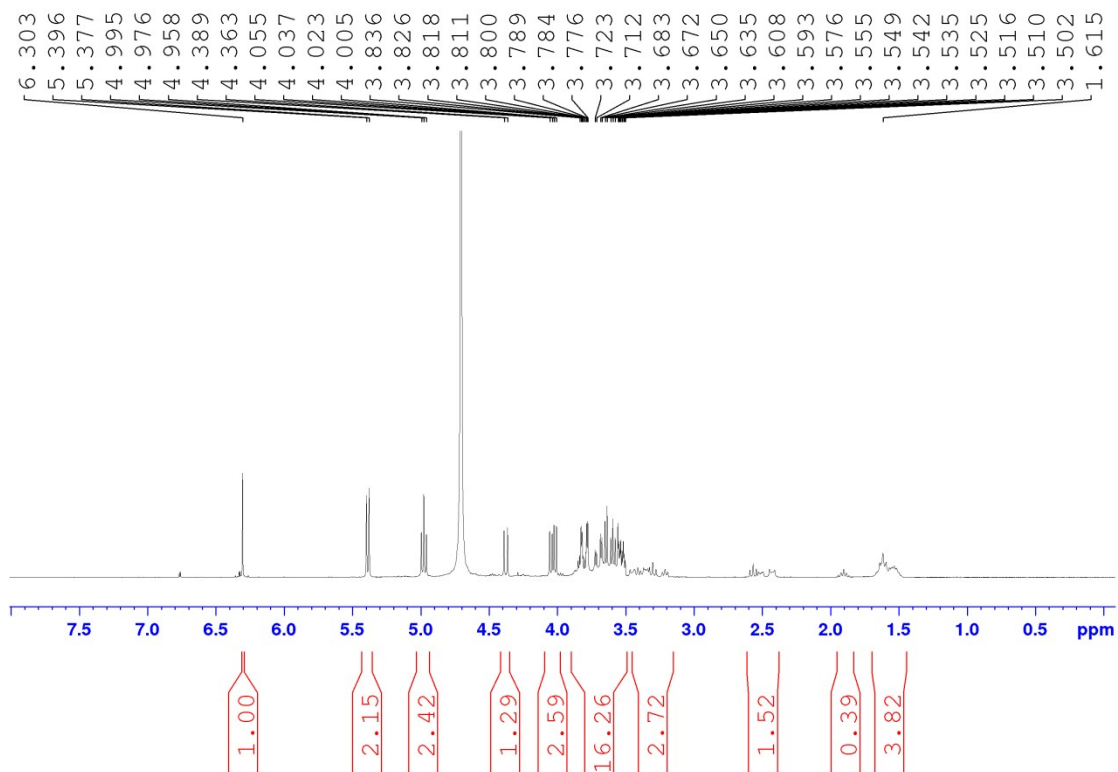

**$^1\text{H}$  NMR of the reaction between D-(+)- ribose, malononitrile with DBU (15 mol%) in  $\text{D}_2\text{O}$  after 140 minutes**

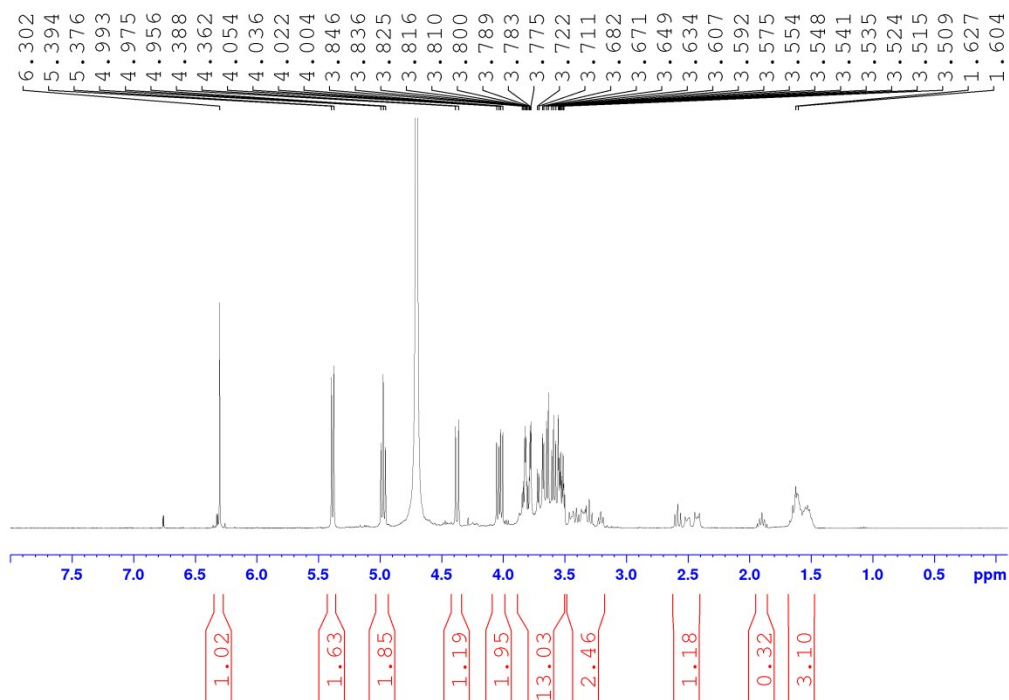

**$^1\text{H}$  NMR of the reaction between D-(+)- ribose, malononitrile with DBU (15 mol%) in  $\text{D}_2\text{O}$  after 160 minutes**

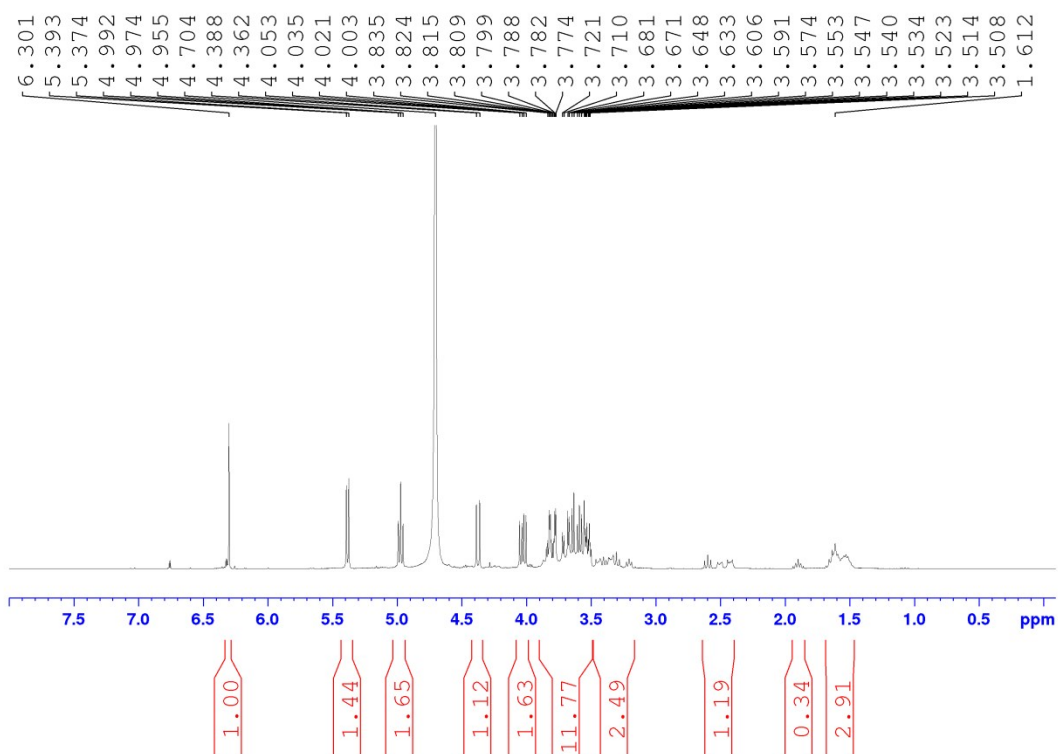

**$^1\text{H}$  NMR of the reaction between D-(+)- ribose, malononitrile with DBU (15 mol% ) in  $\text{D}_2\text{O}$  after 180 m**

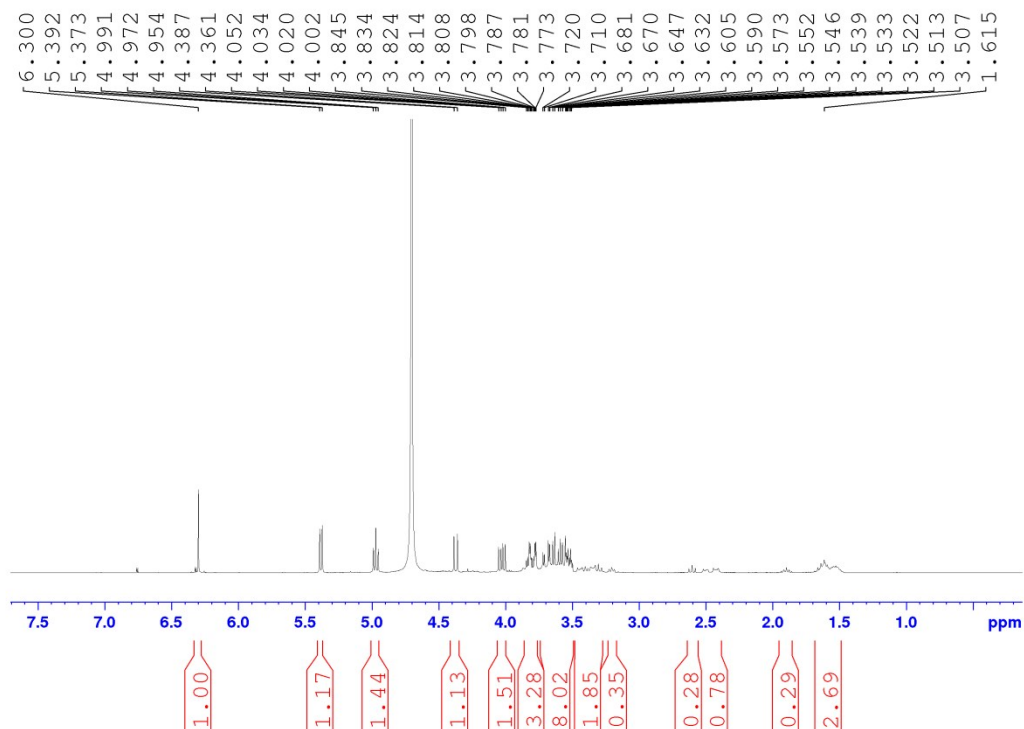

**$^1\text{H}$  NMR of the reaction between D-(+)- ribose, malononitrile with DBU (15 mol% ) in  $\text{D}_2\text{O}$  after 4 h**

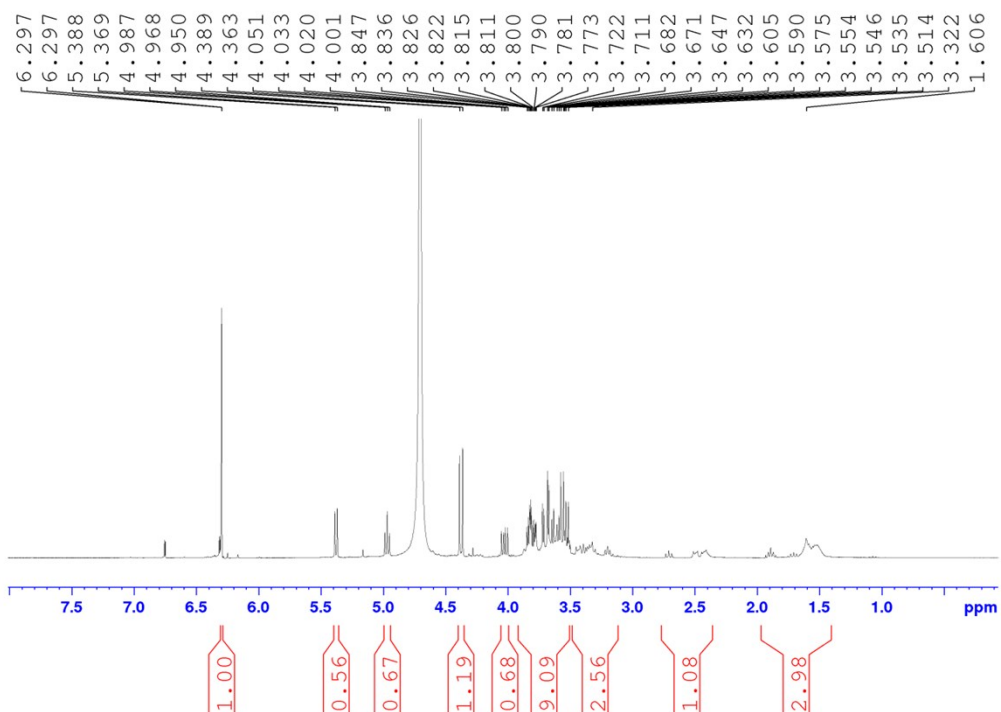

**$^1\text{H}$  NMR of the reaction between D-(+)- ribose, malononitrile with  $\text{K}_2\text{CO}_3$  (15 mol% ) in  $\text{D}_2\text{O}$  after 20 minutes**

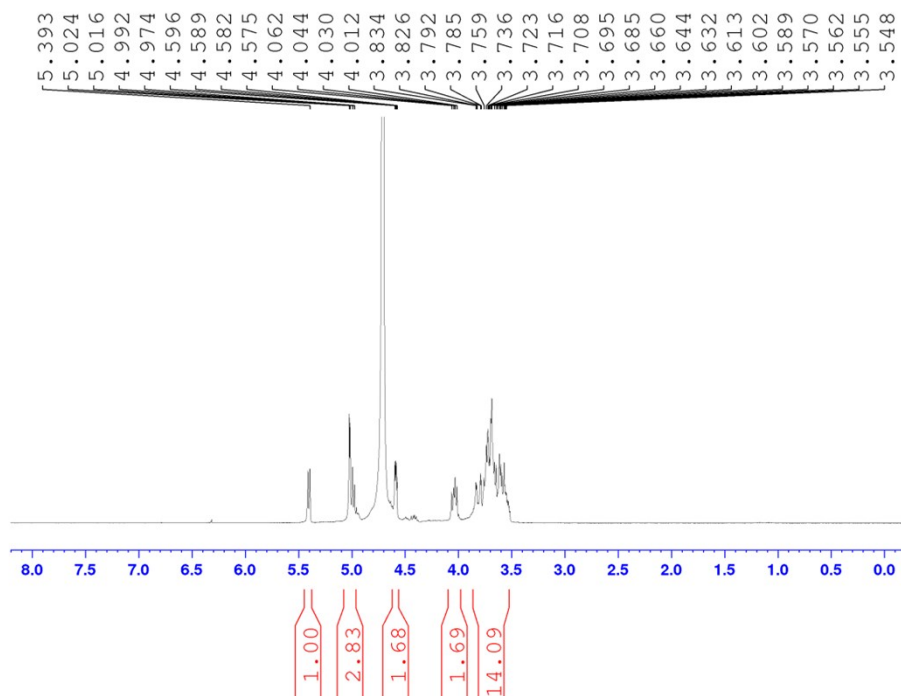

**$^1\text{H}$  NMR of the reaction between D-(+)- ribose, malononitrile with  $\text{K}_2\text{CO}_3$  (15 mol% ) in  $\text{D}_2\text{O}$  after 40 minutes**

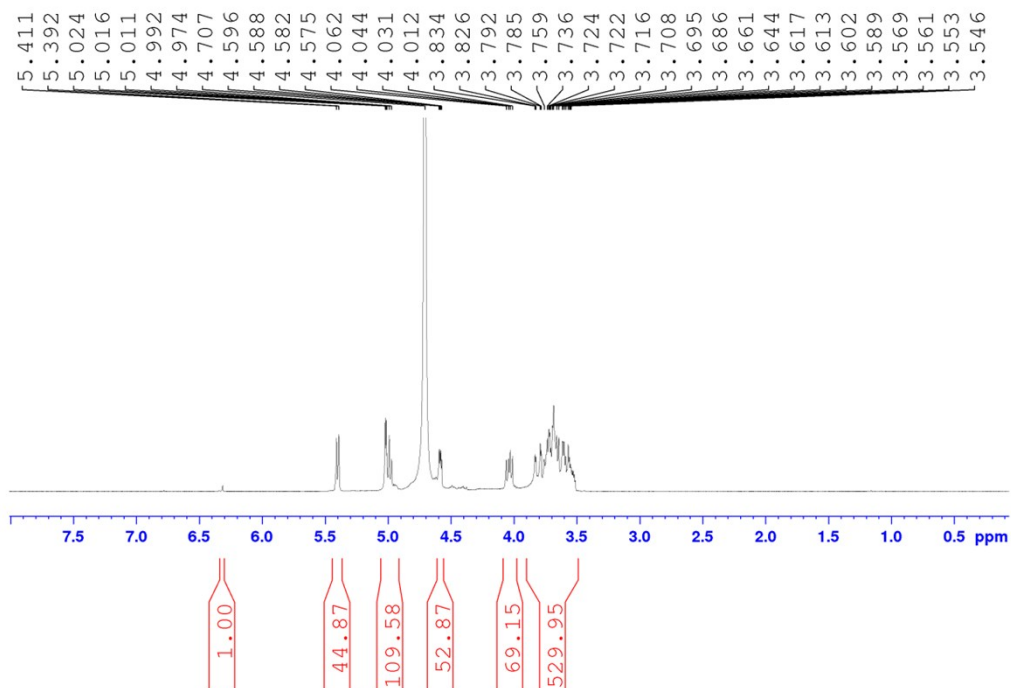



**<sup>1</sup>H NMR of the reaction between D-(+)- ribose, malononitrile with K<sub>2</sub>CO<sub>3</sub> (15 mol% ) in D<sub>2</sub>O after 60 minutes**

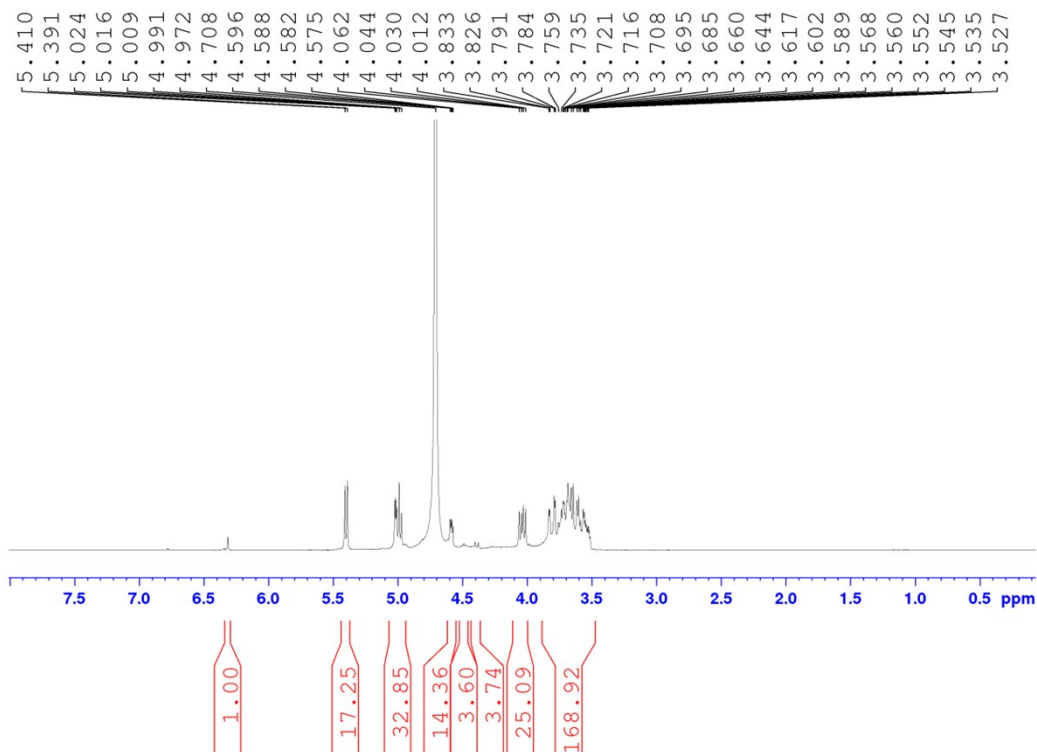

**<sup>1</sup>H NMR of the reaction between D-(+)- ribose, malononitrile with K<sub>2</sub>CO<sub>3</sub> (15 mol% ) in D<sub>2</sub>O after 80 minutes**

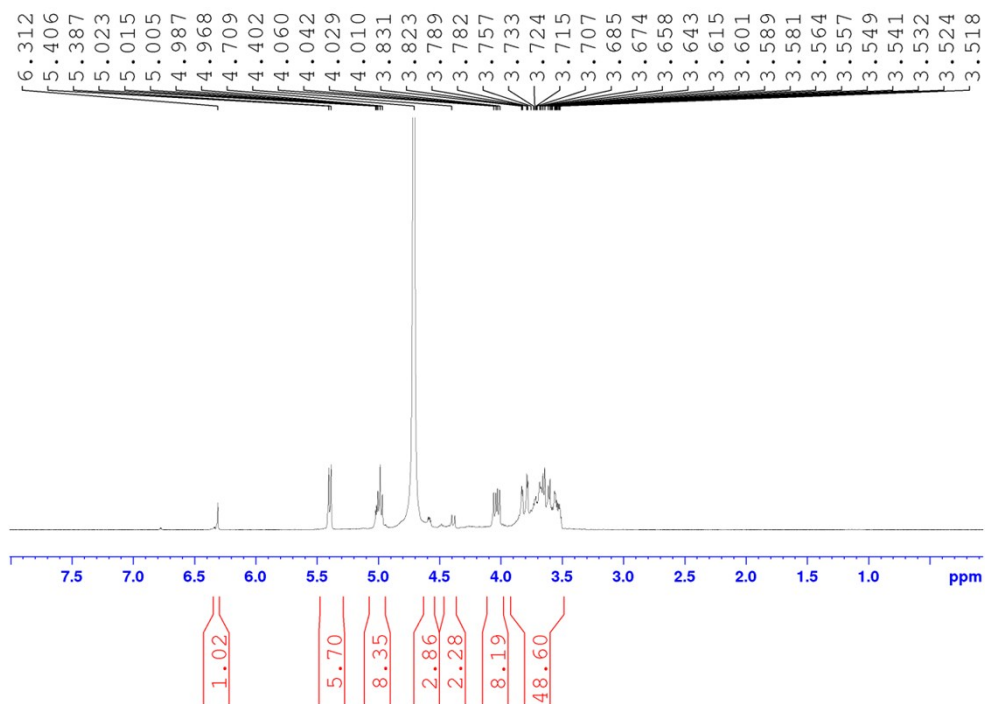



**$^1\text{H}$  NMR of the reaction between D-(+)- ribose, malononitrile with  $\text{K}_2\text{CO}_3$  (15 mol%) in  $\text{D}_2\text{O}$  after 100 minutes**

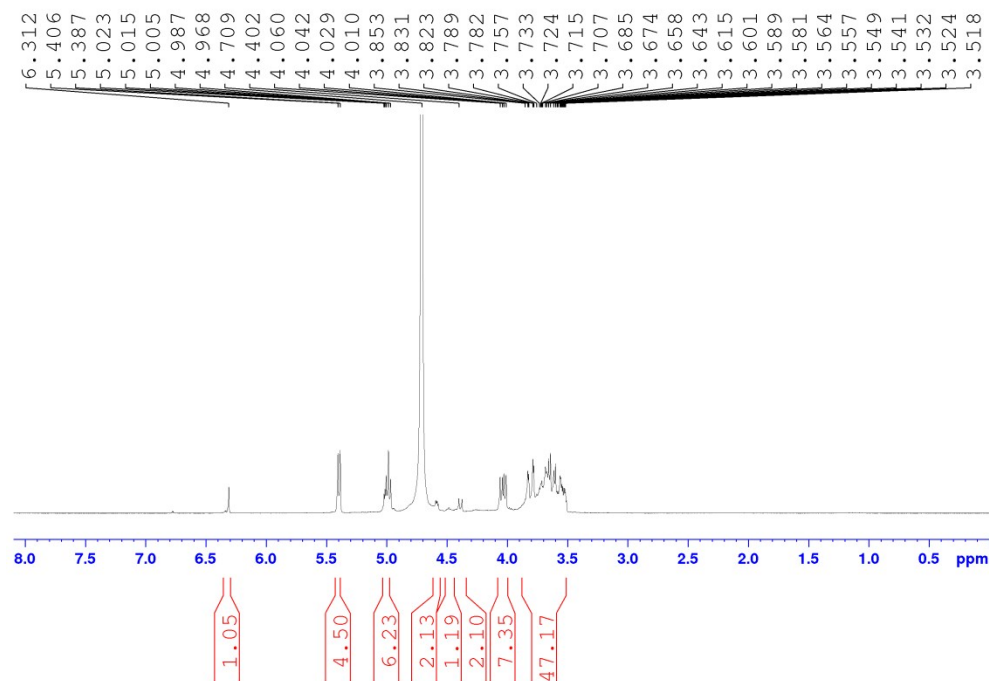

**$^1\text{H}$  NMR of the reaction between D-(+)- ribose, malononitrile with  $\text{K}_2\text{CO}_3$  (15 mol%) in  $\text{D}_2\text{O}$  after 120 minutes**

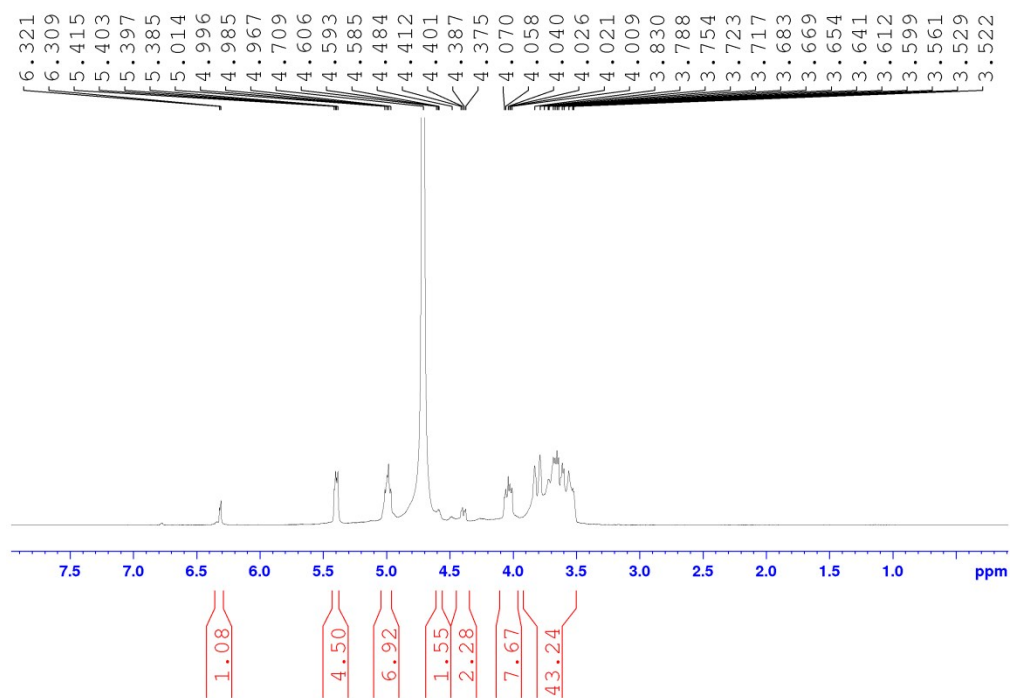

**$^1\text{H}$  NMR of the reaction between D-(+)- ribose, malononitrile with  $\text{K}_2\text{CO}_3$  (15 mol%) in  $\text{D}_2\text{O}$  after 140 minutes**

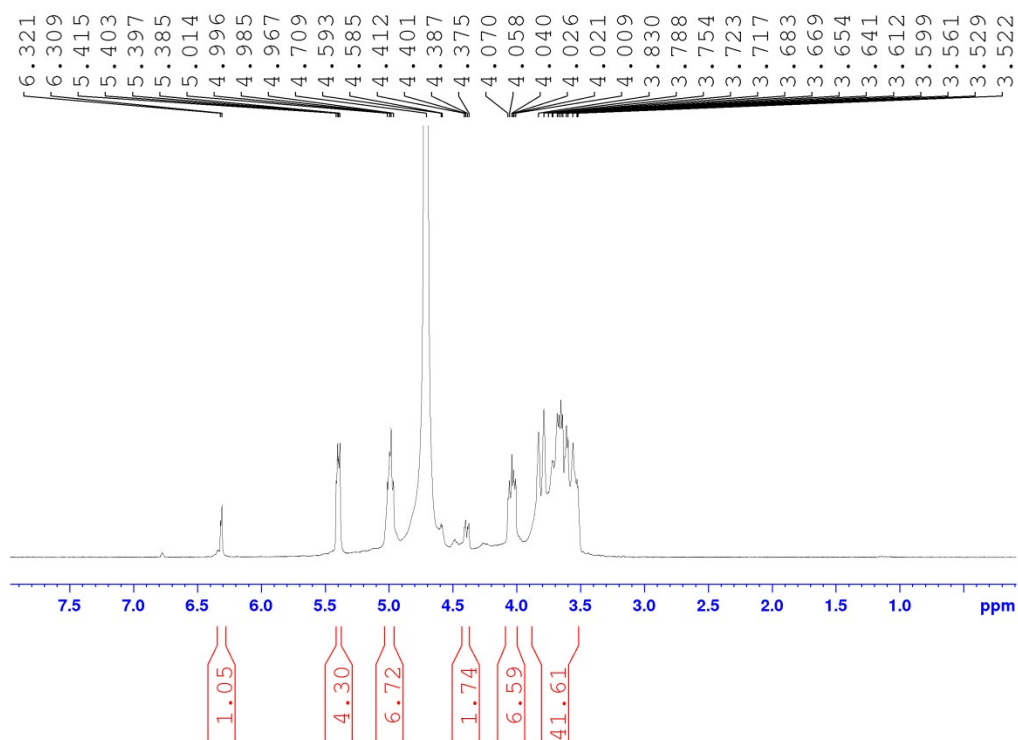

**$^1\text{H}$  NMR of the reaction between D-(+)- ribose, malononitrile with  $\text{K}_2\text{CO}_3$  (15 mol%) in  $\text{D}_2\text{O}$  after 160 minutes**

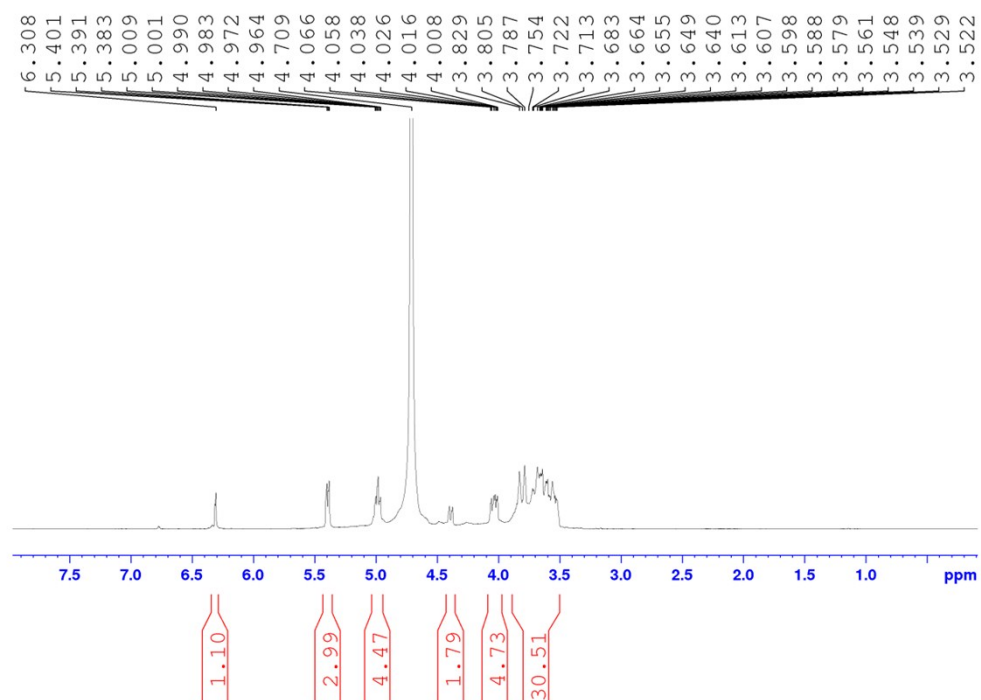

**<sup>1</sup>H NMR of the reaction between D-(+)- ribose, malononitrile with K<sub>2</sub>CO<sub>3</sub> (15 mol%) in D<sub>2</sub>O after 180 minutes**

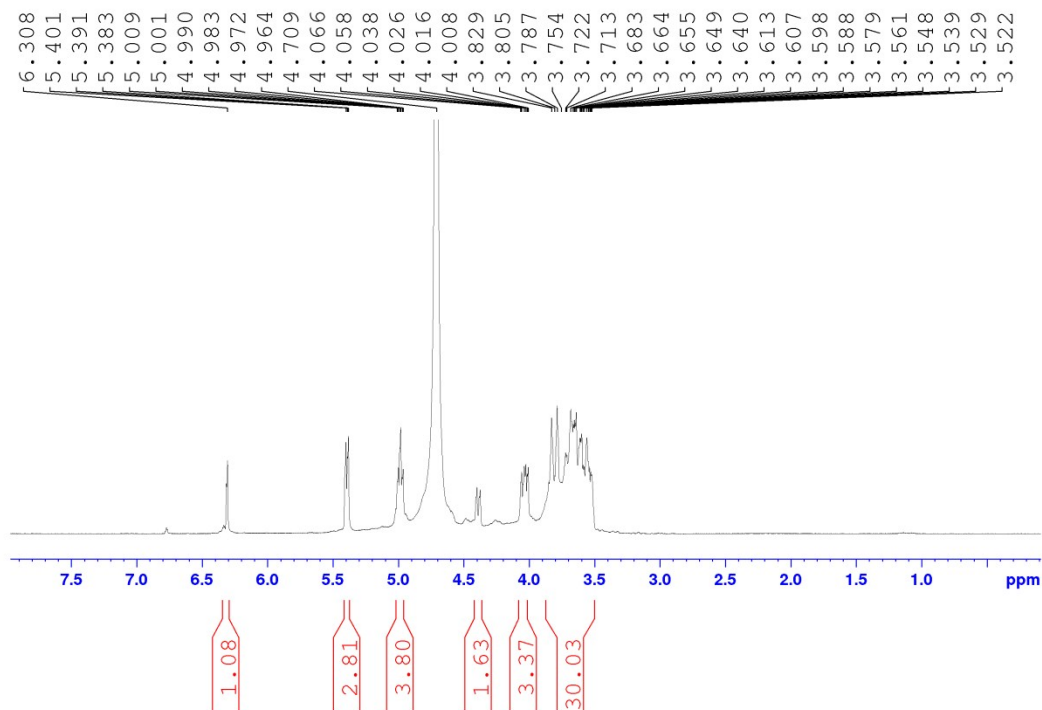

**<sup>1</sup>H NMR of the reaction between D-(+)- ribose, malononitrile with K<sub>2</sub>CO<sub>3</sub> (15 mol%) in D<sub>2</sub>O after 4h**

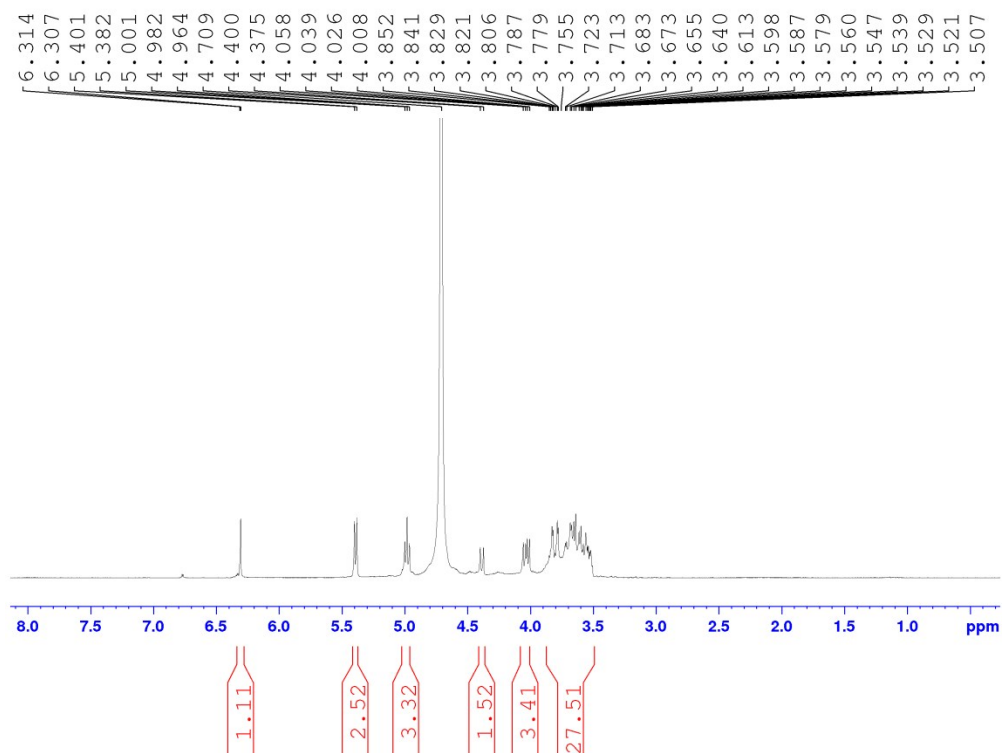

**$^1\text{H}$  NMR of the reaction between D-(+)-ribose, malononitrile with NaOMe (15 mol%) in  $\text{D}_2\text{O}$  after 20 m**

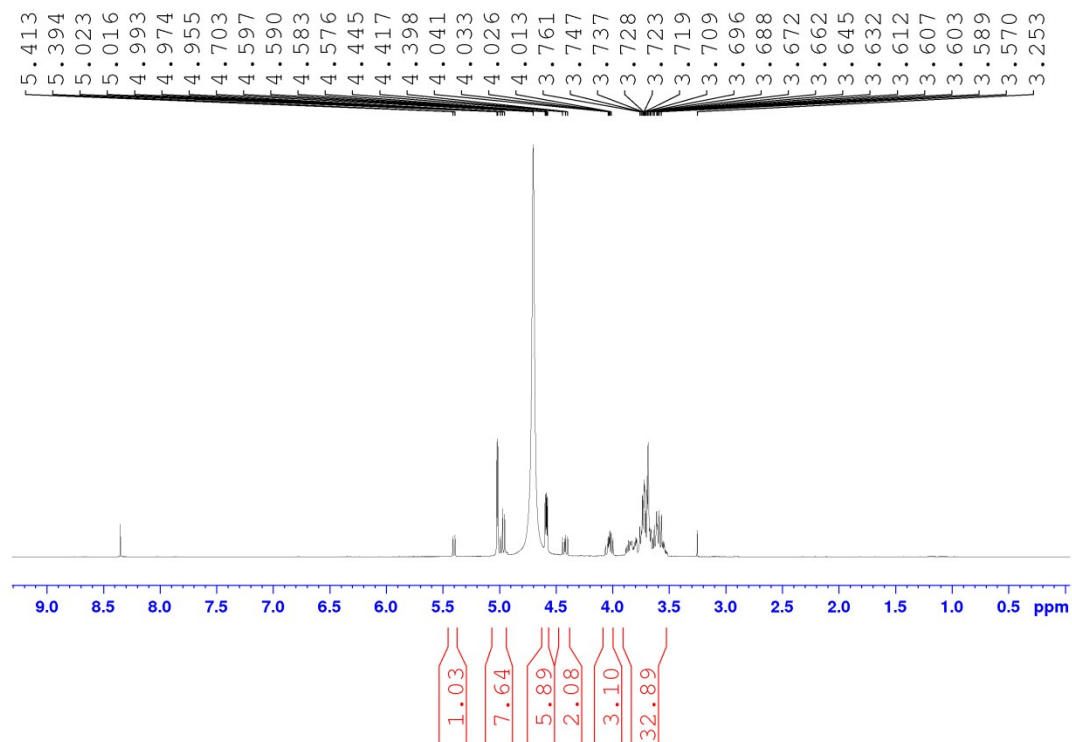

**$^1\text{H}$  NMR of the reaction between D-(+)-ribose, malononitrile with NaOMe (15 mol%) in  $\text{D}_2\text{O}$  after 40 m**

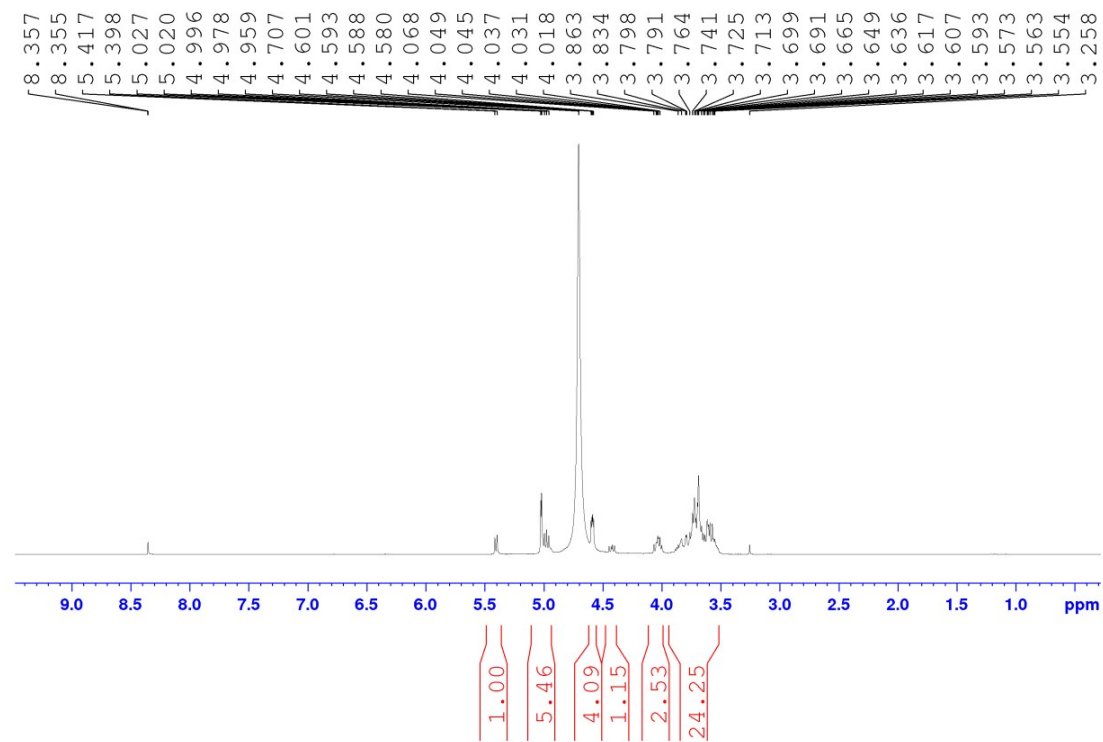

**<sup>1</sup>H NMR of the reaction between D-(+)-ribose, malononitrile with NaOMe (15 mol%) in D<sub>2</sub>O after 60 m**

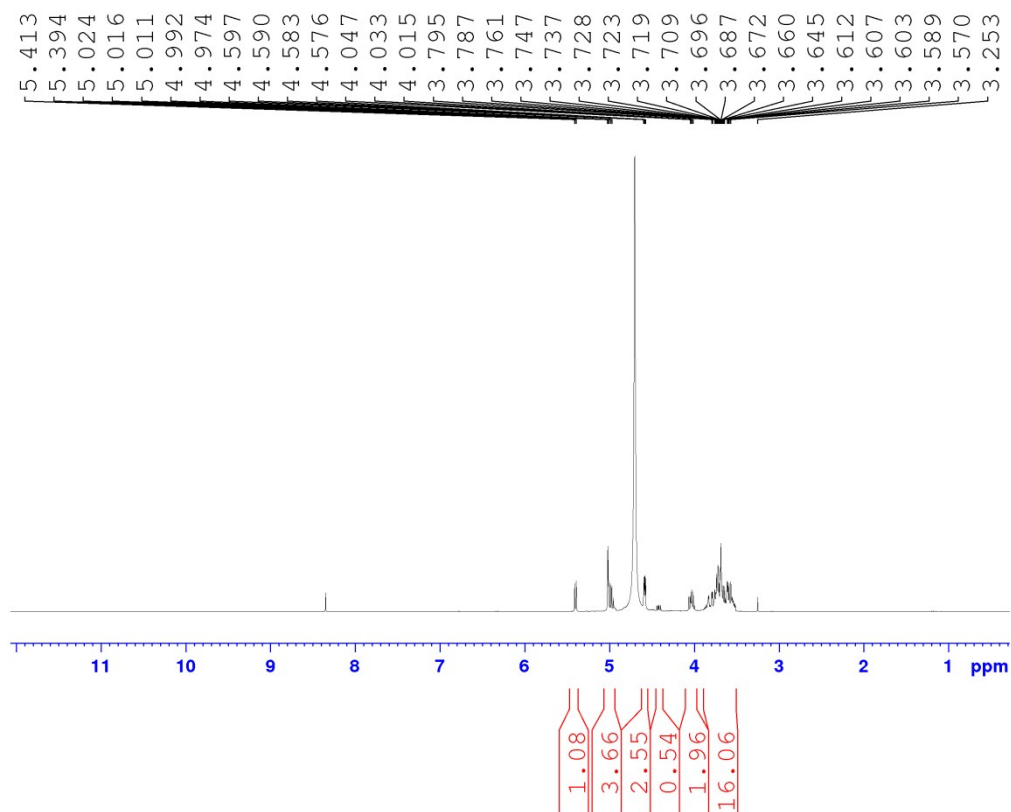

**<sup>1</sup>H NMR of the reaction between D-(+)-ribose, malononitrile with NaOMe (15 mol%) in D<sub>2</sub>O after 80 m**

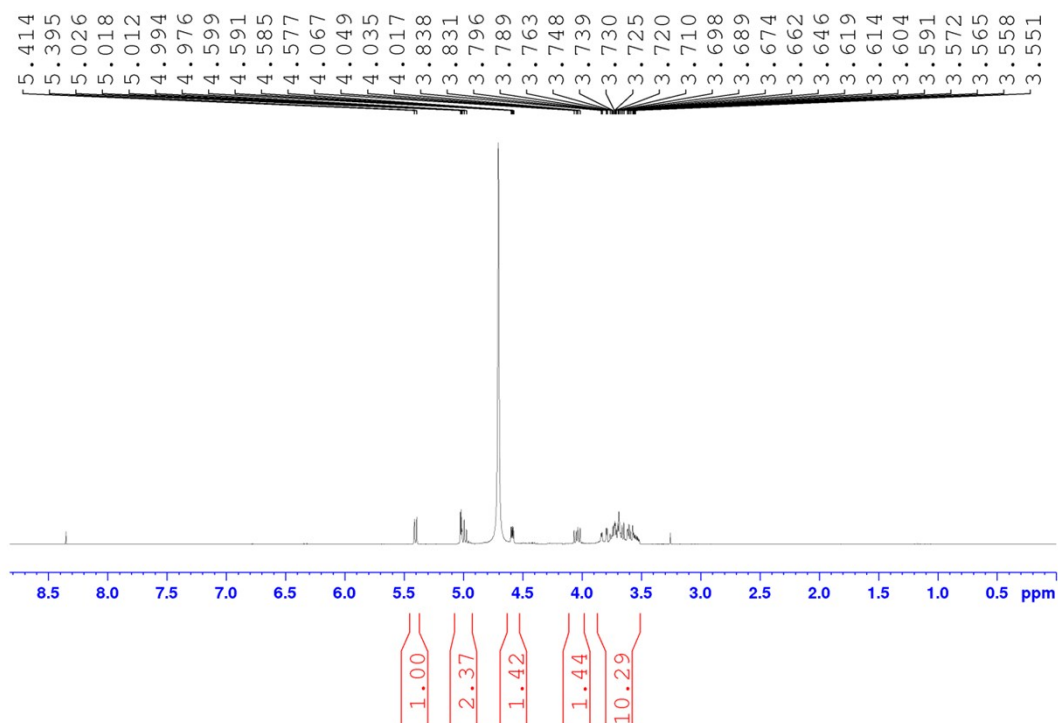

**$^1\text{H}$  NMR of the reaction between D-(+)-ribose, malononitrile with NaOMe (15 mol%) in  $\text{D}_2\text{O}$  after 100 m**

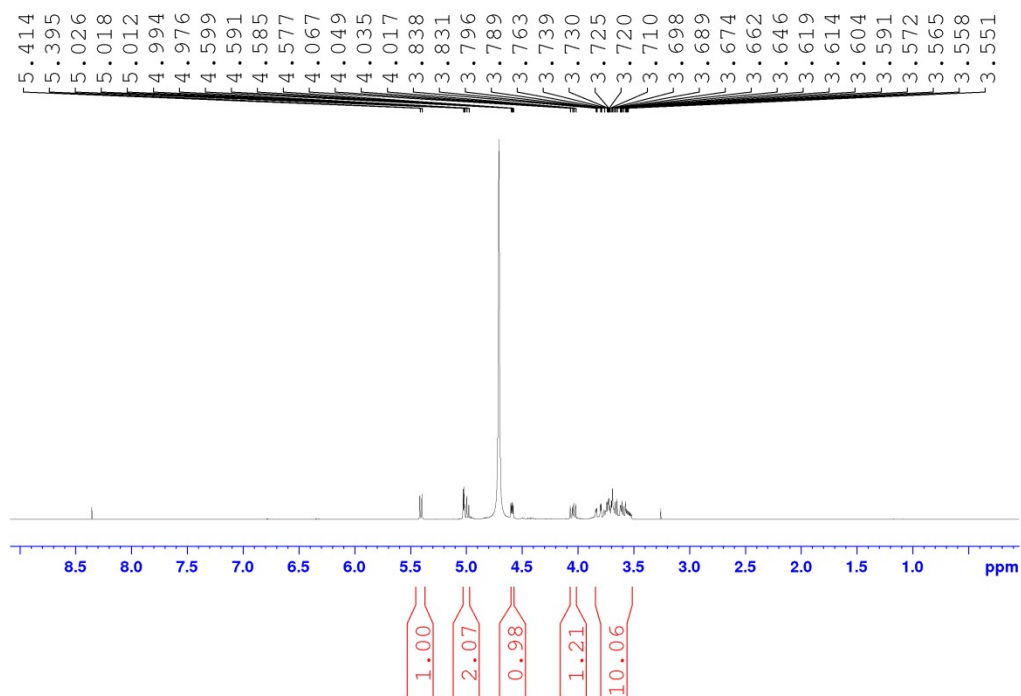

**$^1\text{H}$  NMR of the reaction between D-(+)-ribose, malononitrile with NaOMe (15 mol%) in  $\text{D}_2\text{O}$  after 120 m**

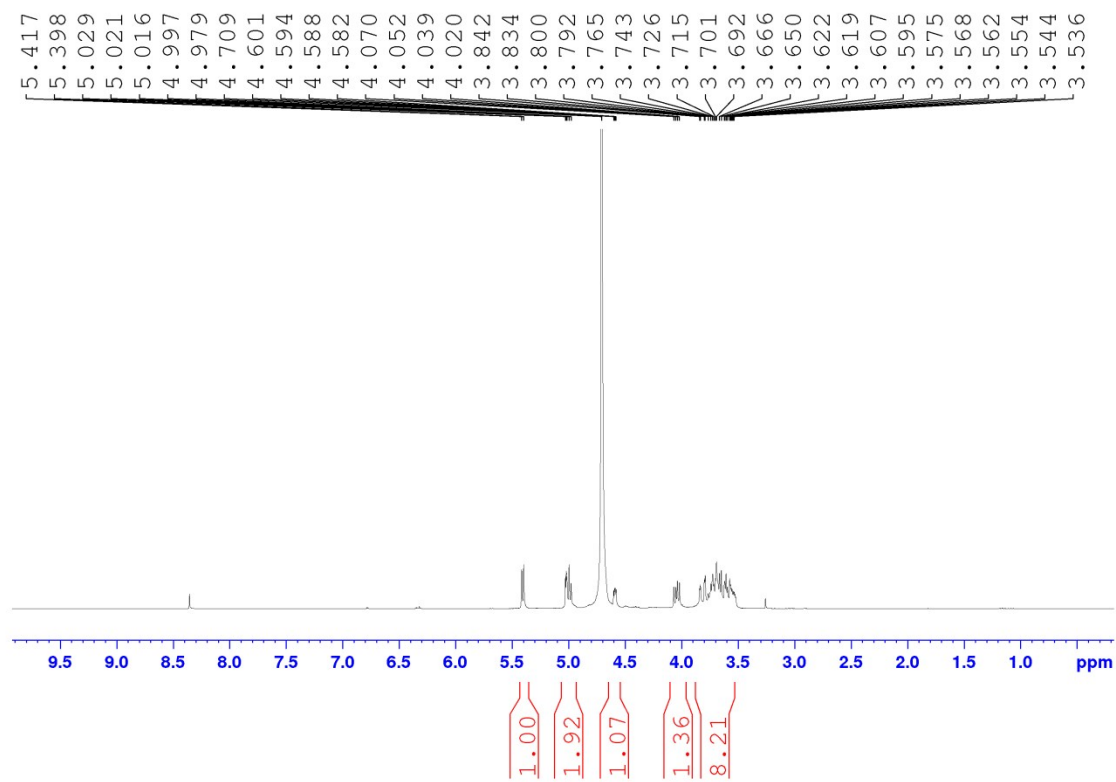

<sup>1</sup>H NMR spectrum of between D-(+)-ribose, malononitrile with NaOMe (15 mol%) in D<sub>2</sub>O after 140 m

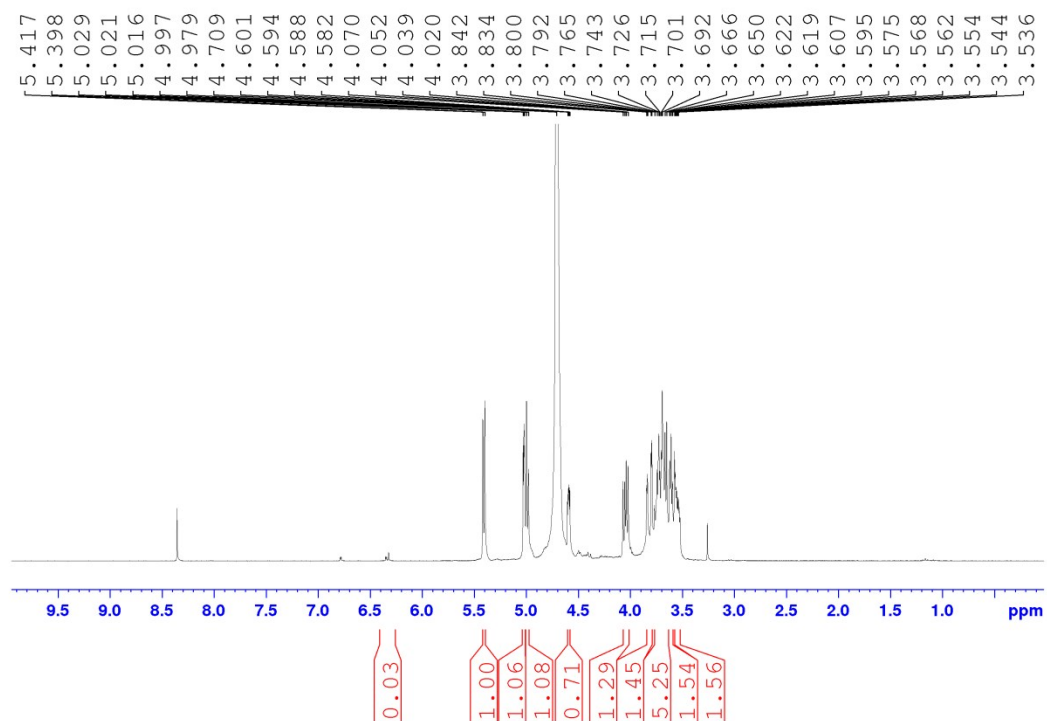

Supplement: c8gc03509a1.pdf [file c8gc03509a1.pdf]
